1                   **Activation of a zinc metallochaperone by the alarmone ZTP**

2

3                   Running title: ZTP activates the ZagA zinc metallochaperone

4

5                   Pete Chandrangsu<sup>1,2</sup>, Xiaojuan Huang<sup>1</sup> and John D. Helmann<sup>1\*</sup>

6                   <sup>1</sup>Department of Microbiology, Cornell University, Ithaca, NY 14853, USA

7                   <sup>2</sup>W.M. Keck Science Department, Claremont McKenna, Pitzer and Scripps College,

8                                           Claremont, CA 91711, USA

9

10                   \*Corresponding author:

11                   John D. Helmann

12                   Department of Microbiology, Wing Hall,

13                   Cornell University, Ithaca, NY 14853-8101.

14                   Email: *[jdh9@cornell.edu](mailto:jdh9@cornell.edu)*

15                   Phone: (607) 255-6570; Fax: (607) 255-3904

16                   Co-author emails: *[pchandrangsu@kecksci.claremont.edu](mailto:pchandrangsu@kecksci.claremont.edu)*; *[hxjxh@gmail.com](mailto:hxjxh@gmail.com)*

17

18

19

20 **Abstract**

21 Bacteria tightly regulate intracellular zinc levels to ensure sufficient zinc to support  
22 essential functions, while preventing toxicity. The bacterial response to zinc limitation  
23 includes the expression of putative zinc metallochaperones belonging to subfamily 1 of  
24 the COG0523 family of G3E GTPases. However, the client proteins and the metabolic  
25 processes served by these chaperones are unclear. Here, we demonstrate that the *Bacillus*  
26 *subtilis* YciC zinc metallochaperone (here renamed ZagA for ZTP activated GTPase A)  
27 supports *de novo* folate biosynthesis under conditions of zinc limitation through direct  
28 interaction with the zinc dependent GTP cyclohydrolase, FolE. Furthermore, we identify  
29 a role for the alarmone ZTP, a modified purine biosynthesis intermediate, in the response  
30 to zinc limitation. ZTP, a signal of 10-formyl-tetrahydrofolate deficiency (10f-THF) in  
31 bacteria, transiently accumulates as the Zn dependent GTP cyclohydrolase FolE begins to  
32 fail and stimulates the interaction between ZagA and FolE to sustain folate synthesis  
33 despite declining zinc availability.

34

35 **Importance.** Metallochaperones provide a mechanism for cells to regulate the delivery of  
36 metals to newly synthesized apoproteins. By selectively targeting specific proteins for  
37 metallation, cells can ensure that key pathways remain functional even as metals become  
38 limiting for growth. The COG0523 family of proteins contain a subgroup of candidate  
39 metallochaperones (the YciC subfamily) induced under conditions of zinc limitation.  
40 Although YciC family proteins have been suggested to be GTP-dependent  
41 metallochaperones, specific interactions with client proteins have not been demonstrated.  
42 Here, we show that the *Bacillus subtilis* YciC (renamed ZagA) protein responds to ZTP

43 as an activating ligand rather than GTP, and interacts specifically with a Zn-dependent  
44 enzyme critical for folate synthesis (FolE). Thus, under conditions of Zn limitation ZagA  
45 is synthesized, and as folate synthesis fails, it selectively delivers Zn to FolE to sustain  
46 folate synthesis.

47

## 48 **Introduction**

49 Transition metals are required for life and participate as cofactors in a wide range  
50 of essential biological functions. Of these, zinc is often considered a "first among equals"  
51 as it serves as cofactor for ~4-10% of all proteins (1). As such, zinc plays a key role in  
52 host-microbe interactions (2). In a process termed nutritional immunity, the host may  
53 restrict bacterial access to zinc in response to infection through the production of  
54 calprotectin, an S100 protein produced by cells of the immune system (3).

55 The physiological states associated with zinc homeostasis can be generally  
56 described as excess, sufficiency, deficiency and limitation (or starvation) (4). Excess zinc  
57 can lead to toxic consequences, and leads to the expression of protective mechanisms  
58 including sequestration or efflux. Sufficiency refers to the optimal zinc concentration to  
59 support zinc dependent cellular processes. Deficiency is characterized by decreased  
60 growth, altered metabolism, and deployment of an adaptive response. As zinc levels fall  
61 further, zinc limitation results as defined by the failure of essential zinc dependent  
62 processes and cessation of growth.

63 Bacteria utilize complex mechanisms to respond to metal stress. In *Bacillus*  
64 *subtilis*, a model Gram-positive bacterium, zinc homeostasis is maintained by the  
65 coordinated action of two DNA binding metalloregulators: Zur, the sensor of zinc

66 sufficiency, and CzrA, the sensor of zinc excess. Under conditions of zinc sufficiency,  
67 the dimeric Fur family metalloregulator Zur binds DNA in its zinc-loaded form and  
68 represses transcription (5). Genes repressed by Zur are derepressed in three distinct  
69 groups as cells transition from sufficiency to limitation (6). This sequential regulation is  
70 facilitated, in part, by negative cooperativity between the two zinc sensing sites, one in  
71 each subunit of the Zur dimer (7).

72         During the initial response to zinc limitation, zinc independent paralogs of the  
73 L31 and L33 ribosomal proteins (L31\* and L33\* r-proteins, respectively) are expressed  
74 (6, 8, 9). The ribosome is proposed to contain 6-8 equivalents of zinc (10). Given that  
75 cells may contain >30,000 copies of the ribosome during rapid growth, the ribosome  
76 represents a substantial zinc storage pool. Two of these zinc containing r-proteins, L31  
77 and L33, are loosely associated with the surface of the ribosome and are non-essential for  
78 translation (11-13). Expression of the Zur-regulated L31\* and L33\* r-proteins, which do  
79 not require zinc for function, facilitates displacement of their zinc-associated paralogs  
80 (L31 and L33) thereby enabling mobilization of ribosome-associated zinc. The  
81 expression of alternative ribosomal proteins under zinc limitation is a conserved feature  
82 in a variety of bacteria (14, 15), and provides a fitness advantage when zinc is limited  
83 (11, 16, 17). This mobilization response precedes the expression of high affinity uptake  
84 systems in both *B. subtilis* (6) and *Salmonella Typhimurium* (18).

85         If cells experience continued zinc starvation, cells shift their adaptive response  
86 from zinc mobilization to zinc acquisition. During this phase, cells derepress the genes  
87 encoding the ZnuABC high affinity uptake system and the YciC protein, a putative zinc  
88 metallochaperone (here renamed ZagA for ZTP activated GTPase A) (6). ZagA is a

89 member of the zinc-associated subfamily 1 of the COG0523 family G3E GTPases (19).  
90 COG0523 proteins are evolutionarily related to well characterized nickel  
91 metallochaperones, including UreG for urease and HypB for nickel hydrogenase (20).  
92 The functions of COG0523 proteins, which are found in all domains of life, are generally  
93 associated with the assembly or function of metalloproteins. COG0523 family  
94 metallochaperones have been identified with functions related to cobalt (CobW), iron  
95 (Nha3) and zinc (YeiR and ZigA) homeostasis (19). However, the functions of COG0523  
96 GTPases with respect to zinc homeostasis are poorly understood. GTPase and zinc-  
97 binding activities have been reported for both *Escherichia coli* YeiR and *Acinetobacter*  
98 *baumannii* ZigA(21, 22). ZigA is postulated to help activate a zinc-dependent histidine  
99 ammonia-lyase, HutH, which is implicated in the mobilization of a histidine-associated  
100 zinc pool (22).

101 As zinc levels are depleted further and essential zinc dependent processes begin to  
102 fail, genes encoding zinc-independent functions are derepressed to compensate and allow  
103 for survival. In *B. subtilis*, derepression of a zinc-independent S14 paralog (RpsNB)  
104 ensures continued ribosome synthesis if the zinc-containing paralog can no longer access  
105 zinc required for proper folding and function (12). S14 is an early assembling r-protein  
106 and is essential for de novo ribosome synthesis. Furthermore, derepression of a zinc  
107 independent GTP cyclohydrolase (FolEB) supports continued folate biosynthesis under  
108 conditions where the constitutively expressed, but zinc dependent FolE enzyme fails (23).  
109 The order of the adaptive responses to declining zinc levels in *B. subtilis* is mobilization  
110 (from ribosomal proteins), acquisition, and finally replacement of zinc-dependent  
111 functions (e.g. S14) with non-zinc containing paralogs (6). This same order of response is

112 also predicted from an analysis of Zur-binding affinities in *Salmonella* Typhimurium  
113 (18).

114 Here, we demonstrate that zinc limitation results in failure of the folate  
115 biosynthetic pathway due to a loss of FolE activity, and this results in a transient purine  
116 auxotrophy that can be partially overcome by the eventual derepression of FolEB. At the  
117 onset of zinc limitation, the purine biosynthetic intermediate 5-aminoimidazole-4-  
118 carboxamide ribonucleotide (AICAR), also known as ZMP, accumulates and is  
119 phosphorylated to generate ZTP. The Zur-regulated metallochaperone ZagA is activated  
120 by ZTP to deliver zinc to FolE to sustain folate synthesis. These results suggest that a  
121 subset of zinc-associated COG0523 proteins are activated by ZTP, rather than GTP, and  
122 provide an example of a physiologically relevant ZTP-receptor protein.

123

## 124 **Results**

### 125 **Zinc deficient cells experience folate starvation**

126 The physiological consequences of zinc starvation are unclear, and given the  
127 ubiquity of zinc as a cofactor for protein-folding and catalysis the precise physiological  
128 processes that fail are not immediately obvious. The strongest hints come from a close  
129 examination of the Zur regulon in diverse bacteria, which often include zinc-independent  
130 paralogs of zinc-dependent proteins (14-16). These zinc-independent proteins are  
131 generally thought to maintain cellular functions that are normally carried out by zinc-  
132 dependent proteins, which may fail under conditions of zinc limitation.

133 In *B. subtilis*, the Zur-dependent regulation of a zinc-independent GTP  
134 cyclohydrolase (FolEB) suggests that folate biosynthesis may represent a major

135 metabolic bottleneck caused by zinc limitation, at least in cells lacking an alternate  
136 enzyme. To determine if folate biosynthesis is also compromised during zinc limitation  
137 of wild-type cells, we compared sensitivity to EDTA, a potent metal chelator known to  
138 result in zinc limitation in *B. subtilis* when grown in minimal medium (5). During growth  
139 in minimal medium, the folate biosynthetic pathway is active and 50  $\mu$ M EDTA elicited  
140 growth inhibition which could be reversed by addition of inosine (**Fig 1A**). This suggests  
141 a failure of purine biosynthesis, which is known to be a major consequence of folate  
142 limitation. Moreover, cells lacking *folE2*, and therefore completely reliant on FolE for *de*  
143 *novo* folate biosynthesis, were significantly more sensitive to EDTA inhibition than wild-  
144 type (**Fig 1B**). These results suggest that zinc limitation results in folate deficiency due to  
145 failure of the zinc dependent enzyme FolE, and this can limit growth even when the  
146 alternative, zinc-independent FolE (FolEB) can be induced to compensate for FolE  
147 failure.

148 Folate derived cofactors, such as tetrahydrofolate (THF), are required for a  
149 number of cellular processes. Inhibition of THF biosynthesis leads to cell death as a  
150 result of purine auxotrophy and consequent thymine deficiency (“thymineless death”)  
151 (24). In *B. subtilis*, purine biosynthesis is the primary bottleneck caused by 10f-THF  
152 depletion after treatment with antifolates, such as trimethoprim (TMP) (25). 10f-THF is  
153 used as a formyl group donor at two steps in purine biosynthesis (**Fig 1C**). As also noted  
154 in prior studies, 10f-THF deficiency leads to the failure of the later step required for  
155 inosine monophosphate (IMP) production, the common precursor to ATP and GTP (26).  
156 This critical step is catalyzed by PurH, a bifunctional enzyme that utilizes 10-formyl-

157 tetrahydrofolate as a formyl donor to convert AICAR (aminoimidazole carboxamide  
158 ribonucleotide or ZMP) into IMP.

159

### 160 **Accumulation of Z nucleotides (ZMP/ZTP) protects cells from zinc starvation**

161 In the course of these studies, we unexpectedly observed that a *purH* mutant is  
162 more resistant than wild-type to zinc limitation when grown on rich medium (LB) (**Fig.**  
163 **2A**). The phenotypes associated with disruption of *purH* may result from a general  
164 inability to produce purines and/or the accumulation of the IMP precursor, ZMP. To  
165 distinguish between these models, we generated a strain lacking *purB*, which is  
166 immediately upstream of *purH* in the purine biosynthetic pathway and catalyzes ZMP  
167 production (**Fig 1C**). We reasoned that if the contribution of *purH* to zinc homeostasis  
168 requires ZMP, the phenotypes associated with loss of *purH* would be abrogated in the  
169 absence of *purB*. Indeed, a *purB* mutant is more sensitive to EDTA than wild-type, and  
170 this effect is dramatically enhanced in a strain also lacking the ZnuABC zinc uptake  
171 system (**Fig 2A,B**). These data link ZMP to zinc homeostasis and suggest that  
172 accumulation of ZMP, or the resultant ZTP, may protect cells against zinc limitation.

173

### 174 **ZTP serves as a signal of folate deficiency during zinc limitation**

175 Disruption of *purH* or loss of 10f-THF production is predicted to result in the  
176 accumulation of the purine intermediate ZMP (or AICAR) (**Fig 1C**). ZMP is  
177 phosphorylated to produce ZTP, an “alarmone” proposed to act as a signal of 10f-THF  
178 deficiency by Bochner and Ames in 1982 (26). The functional consequence of ZTP  
179 accumulation remained a mystery for over thirty years until the discovery of ZTP sensing



180 riboswitches that regulate expression of genes which ensure sufficient 10f-THF to  
181 support purine biosynthesis (27). Our data suggest that ZMP/ZTP is also linked to the *B.*  
182 *subtilis* response to zinc limitation, despite the lack of any known ZMP/ZTP-sensing  
183 riboswitches in the *B. subtilis* 168 strain. We hypothesized that zinc limitation may  
184 induce folate deficiency thereby leading to an accumulation of ZMP/ZTP, which then  
185 mediates an increased resistance to zinc depletion by an unknown mechanism.

186 To evaluate intracellular Z nucleotide levels during zinc depletion, we monitored  
187 expression of a *lacZ* reporter construct under the control of the *B. subtilis* *SG-1 pfl*  
188 riboswitch (**Fig 3A**) (27). Since the *pfl* riboswitch does not distinguish between ZMP and  
189 ZTP, this reporter provides an estimate of total Z nucleotide levels (27). Z nucleotide  
190 binding to the riboswitch aptamer domain prevents the formation of a transcription  
191 termination stem-loop structure located upstream of the translation start site (**Fig 3A**). We  
192 speculated that zinc deprivation induced by EDTA would result in an increase in reporter  
193 expression. Indeed, we observed induction of the *pfl-lacZ* reporter in the presence of an  
194 EDTA impregnated disk (**Fig 3B**).

195 As monitored by the activity of the *pfl-lacZ* reporter, ZMP/ZTP accumulation by  
196 EDTA was transient, reaching a maximum after ~20 minutes of exposure to 250  $\mu$ M  
197 EDTA (**Fig 3C**). We note that the induction of the *pfl* riboswitch commenced after  
198 induction an early induced Zur-repressed gene (*zinT*), and correlated in time with the  
199 induction of the middle gene, *zagA* (formerly *yciC*), as monitored by RT-PCR.  
200 Interestingly, the subsequent decrease in *pfl-lacZ* reporter expression was correlated with  
201 the derepression of the late gene, *folE2* (**Fig 3C**). We reasoned that the restoration of *de*  
202 *novo* folate biosynthesis by *FolE2* would restore PurH activity and thereby consume

203 ZMP. Together with turnover of ZTP, this would lead to a loss in activation of the *pfl*  
204 riboswitch. Indeed, expression from the *pfl* riboswitch remained elevated in the absence  
205 of *folE2* (**Fig 3C**). Additionally, constitutive expression of *folE2* prior to zinc limitation  
206 prevented the accumulation of Z nucleotides (**Fig 3C**). These data are consistent with our  
207 hypothesis that zinc limitation results in a failure of folate biosynthesis due to a loss of  
208 PurH activity and Z nucleotide accumulation.

209

### 210 ***B. subtilis* ZagA protects cells from zinc starvation and requires Z nucleotides**

211 The consequences of Z nucleotide accumulation on zinc homeostasis are not well  
212 understood. One possibility is that Z nucleotides may directly interact with zinc and serve  
213 as an intracellular zinc buffer. However, ZTP does not bind zinc with high affinity (**Fig**  
214 **S1**). Alternatively, Z nucleotides may serve as a signal for zinc limitation. The only  
215 known Z nucleotide receptor is the recently described *pfl* riboswitch (27), which is not  
216 present in the laboratory strain of *B. subtilis* 168 used in our studies. This motivated us to  
217 consider alternative possibilities for Z nucleotide effectors.

218 Given the close association of the *pfl* riboswitch with folate biosynthetic genes in  
219 other bacteria (27), we surmised that ZTP accumulation (e.g. in a *purH* mutant) might  
220 facilitate growth under zinc limiting conditions by affecting folate biosynthesis. In many  
221 bacteria, *folE2* is located in close chromosomal association with a COG0523 protein, a  
222 Zur-regulated GTPase proposed to deliver zinc to proteins under conditions of zinc  
223 limitation (19). We therefore speculated that YciC, a *B. subtilis* COG0523 protein, might  
224 function as a ZTP-associated GTPase (ZagA) to deliver zinc to one or more client  
225 proteins. Consistent with this hypothesis, a *zagA* mutant is more sensitive to EDTA than

226 wild type (**Fig 4A**). Moreover, the EDTA resistance of a *purH* mutant, which  
227 accumulates Z nucleotides, is abrogated when *zagA* is deleted (**Fig 4A**). Additionally, the  
228 effect of mutation of *zagA* and *purB* nucleotides, is not additive (**Fig 4A**). This indicates  
229 that the increased resistance to zinc deprivation in the *purH* strain, which accumulates  
230 ZMP/ZTP, requires ZagA. Finally, we note that in a strain (*purB*) unable to make Z  
231 nucleotides, *zagA* no longer has a discernable role in resistance to zinc deprivation.  
232 Similar results were seen in a *znuABC* mutant background (**Fig S2**). The greater  
233 sensitivity of the *purB* mutant relative to the *zagA* may suggest that Z nucleotides also  
234 have ZagA-independent roles.

235

### 236 **ZagA is a both a GTPase and a ZTPase**

237 ZagA is a member of the COG0523 family of G3E GTPases, which have been  
238 shown to hydrolyze GTP *in vitro* (21, 22). Indeed, under our conditions, ZagA is a  
239 GTPase with an apparent  $K_m$  for GTP of 40  $\mu\text{M}$ , consistent with that measured for other  
240 COG0523 proteins (**Fig 4B**). Since intracellular ZMP and ZTP levels rise to levels at or  
241 near GTP levels ( $\sim 4x$  for ZMP;  $\sim 0.8x$  for ZTP) upon folate starvation (26), and in light of  
242 the structural similarity between ZTP and GTP, we hypothesized that ZagA may also  
243 interact with and hydrolyze Z nucleotides. Indeed, ZagA is a ZTPase with an apparent  $K_m$   
244 for ZTP (36  $\mu\text{M}$ ) comparable to that of GTP (**Fig 4B**). Furthermore, GDP-NP, a non-  
245 hydrolyzable analog of GTP, inhibited ZTP hydrolysis (**Fig 4C**). Conversely, ZMP  
246 inhibited GTP hydrolysis (**Fig 4D**). These data indicate that both ZTP and GTP are ZagA  
247 substrates.

248

249 **Z nucleotides trigger ZagA interaction with FolE to sustain folate synthesis during**  
250 **zinc limitation**

251 Information regarding client proteins served by COG0523 family proteins is  
252 limited. Given the synteny and zinc-dependent coregulation of *zagA* and *folE2*, we  
253 postulated that ZagA might physically interact with either FolEB or the zinc-dependent  
254 FolE proteins. However, in initial studies using a bacterial two-hybrid assay, no  
255 interaction was observed with either protein. Since ZagA can hydrolyze ZTP *in vitro*, we  
256 reasoned that the putative ZagA interaction with its client proteins may require Z  
257 nucleotides. Therefore, we reassessed the interaction in cells grown on minimal medium  
258 where the purine biosynthetic pathway is active and Z nucleotides are produced. In  
259 addition, we utilized the folate biosynthesis inhibitor trimethoprim (TMP) to induce Z  
260 nucleotide accumulation. Interaction between ZagA and FolE was only detected when the  
261 cells were treated with the antifolate TMP (**Fig 5A, B**) and the strength of this interaction  
262 increases in a concentration dependent manner (**Fig S3**). In contrast, no interaction  
263 between ZagA and FolE2 was observed (**Fig 5A**). These data support a model where  
264 ZagA functions as a chaperone to deliver zinc to FolE in a ZTP dependent manner. By  
265 sustaining FolE activity, ZagA and ZTP serve to delay the failure of folate biosynthesis  
266 under conditions of declining zinc availability.

267 Since Zur regulated COG0523 family proteins are often encoded in close  
268 proximity with the gene encoding FolEB, we reasoned that the interaction of COG0523  
269 family proteins and FolE may be broadly conserved. Using this bacterial two hybrid  
270 assay, we detected significant interaction between the *Acinetobacter baylyi* ZagA

271 homolog and its FolE in the presence of TMP (**Fig 5C**). Furthermore, *A. baylyi* ZagA  
272 interacts with *B. subtilis* FolE, and *B. subtilis* ZagA with *A. baylyi* FolE (**Fig 5C**).

273 *Acinetobacter baumannii* encodes a distinct COG0523 family member, ZigA, that  
274 is postulated to function in the metallation of histidine ammonium lyase (22). No  
275 significant interaction was observed between ZigA and FolE2 of *Acinetobacter baumannii*,  
276 nor can *A. baumannii* ZigA interact with *A. baylyi* or *B. subtilis* FolE (**Fig 5C**).

277 Additionally, ectopic expression of *A. baylyi* ZagA, but not *A. baumannii* ZigA, is able to  
278 complement the EDTA sensitivity of a *B. subtilis* *zagA* mutant (**Fig 5D**). These data  
279 suggest that ZagA-related COG0523 proteins sustain FolE-dependent folate biosynthesis  
280 under zinc deficiency (leading to *zagA* induction) and when folate synthesis fails (as  
281 signaled by Z nucleotide accumulation). Moreover, this adaptive response is likely  
282 present in many bacteria, and other COG0523 proteins, such as ZigA (22), likely have  
283 related functions, but with different client proteins.

284 To directly assess the impact of ZagA on FolE function, we monitored FolE GTP  
285 cyclohydrolase I activity as a function of time after exposure to a subinhibitory  
286 concentrations of EDTA (250  $\mu$ M) to induce zinc deficiency (**Fig 6**). A fluorescence  
287 based assay in which the conversion of GTP to dihydroneopterin triphosphate was used  
288 to monitor FolE activity in crude cell extracts (28). After 30 minutes of exposure to  
289 EDTA, FolE activity decreased slightly in wild type and near full activity was recovered  
290 after 60 minutes, presumably to Zur-regulon derepression and FolE2 expression.

291 Consistent with this hypothesis, restoration of FolE activity was not observed in cell  
292 extracts prepared from strains lacking *folE2*. In strains lacking ZagA, FolE activity

293 decreases dramatically compared to wild-type after 30 min before recovering, which  
294 suggests that ZagA supports FolE activity under conditions of zinc deficiency.

295

296 **ZagA accesses a ribosome-associated zinc pool to support FolE function.**

297 The initial response of *B. subtilis* to zinc limitation is the derepression of two  
298 alternative ribosomal proteins (L31\* and L33\*) that can displace their zinc-containing  
299 paralogs from the surface of the ribosome (6, 13). The release of L31 and L33 is  
300 postulated to mobilize a pool of bioavailable zinc to sustain critical zinc-dependent  
301 enzymes. We therefore set out to quantify the contribution of L31 and L33 to the cellular  
302 zinc quota and to test whether ZagA relies on this pool of mobilizable zinc to sustain  
303 FolE function.

304 To quantify the mobilizable zinc pool associated with ribosomal proteins, we  
305 measured total intracellular zinc and the zinc content of purified ribosomes in several  
306 genetic backgrounds. Our results indicate that ribosome-associated zinc (0.19 mM)  
307 accounts for ~20% of total cellular zinc (0.88 mM), with  $\sim 5.6 \pm 0.9$  zinc ions per  
308 ribosome (n=6) when cells are grown in rich LB medium. In strains missing the zinc  
309 containing L31 (*rpmE*) and L33 ribosomal proteins (encoded by *rpmGA* and *rpmGB*),  
310 total cellular zinc and ribosomally associated zinc is reduced to 0.73 mM and 0.12 mM  
311 respectively. As expected, the estimated zinc per ribosome in strains lacking L31 and L33  
312 decreases by ~2 ( $\sim 3.6 \pm 0.8$  zinc ions per ribosome; n=4). Under these growth conditions,  
313 we estimate a total content of ribosomes of  $2.5 \pm 0.5 \times 10^4$  per cell. Thus, the mobilization  
314 of zinc from the ribosome can potentially redistribute  $\sim 5 \times 10^4$  zinc atoms per cell

315 (depending on total ribosome content per cell at the onset of zinc deficiency), which  
316 represents a substantial pool of zinc to sustain growth.

317 To monitor the impact of ribosome-associated zinc on the intracellular  
318 bioavailable zinc pools we took advantage of the ability of Zur to serve as a bioreporter.  
319 The *folEB* gene is only induced when zinc levels fall to growth limiting levels as one of  
320 the last genes induced during zinc depletion (6). We therefore fused the Zur-regulated  
321 *folEB* promoter to an operon encoding luciferase and monitored gene expression in  
322 response to zinc depletion elicited with EDTA (**Fig S4**). In wild-type cells we failed to  
323 observe induction from the *folEB* promoter, even with concentrations of EDTA (5  $\mu$ M  
324 and 10  $\mu$ M) that slowed growth. In contrast, cells lacking the gene encoding L31\* (*ytiA*,  
325 also renamed as *rpmEB*), displayed a strong induction from the *folEB* promoter, despite  
326 displaying an overall similar response to EDTA in terms of growth inhibition. This  
327 suggests that induction of L31\* is required to mobilize zinc from the ribosome and that,  
328 in so doing, it delays the decrease in cellular zinc levels that is required for derepression  
329 of the *folEB* promoter. Cells lacking the zinc-containing L31 protein (*rpmE*) were much  
330 more sensitive to growth inhibition by EDTA (**Fig S4**) and displayed a very strong  
331 transcriptional induction of *folEB* even at the lowest tested levels of EDTA. These results  
332 suggest that cells lacking L31 are much more easily depleted of zinc, and this effect is  
333 stronger than in cells lacking L31\*. One interpretation of this result is that L31\*  
334 stimulates the mobilization of zinc from L31, but may not be absolutely required for cells  
335 to access this zinc pool. We note that in *B. subtilis* 168 strains, the corresponding zinc  
336 mobilization system involving the L33 proteins is often inactive due to a frame-shift  
337 mutation in the gene (*rpmGC*) encoding the zinc-independent paralog (L33\*). This likely

338 contributes to the strong phenotypes noted here due to disruption of the L31\*/L31 zinc  
339 mobilization response.

340 We hypothesized that zinc mobilized from the ribosome may be utilized by ZagA  
341 to support FolE activity under conditions of zinc limitation. We therefore monitored the  
342 decline in FolE GTP cyclohydrolase activity in extracts from strains lacking either the  
343 L31 (*rpmE*) or L31\* (*rpmE2*) proteins after treatment with EDTA (**Fig 6**). In both cases,  
344 FolE activity declined more rapidly within the first 20 minutes of EDTA treatment when  
345 compared to wild-type. Additionally, the effect of *zagA* and *rpmE* or *rpmE2* were not  
346 additive, which suggests that ZagA and the ribosomal proteins function in the same  
347 pathway. These data support a model in which zinc mobilized from the surface of the  
348 ribosome by the earliest induced proteins (including L31\* and when present L33\*) can  
349 then be used by ZagA to support FolE function, and thereby delay the eventual induction  
350 of the alternative enzyme FolEB.

351

## 352 **Discussion**

353 Accumulation of Z nucleotides as a result of folate limitation has been linked to  
354 diverse metabolic consequences. In mammals, ZMP (or AICAR) is able to inhibit the  
355 proliferation of many types of cancer cells due to the activation of AMP-activated protein  
356 kinase, a regulator of the cellular response to metabolic imbalances (29). In bacteria,  
357 ZMP is known to be an allosteric inhibitor of enzymes involved in gluconeogenesis  
358 (fructose-1,6-bisphosphatase) and coenzyme A biosynthesis (pantoate  $\beta$ -alanine ligase)  
359 (30, 31). However, the impact of ZTP, the triphosphorylated ZMP derivative, on cellular  
360 physiology is less well understood.



361 Over 30 years ago, ZTP was proposed to act as a signal of 10f-THF deficiency  
362 (26). Only recently, with the recent discovery of the ZTP sensing *pfl* riboswitch, was ZTP  
363 accumulation shown to influence purine and folate biosynthesis gene expression (27). To  
364 date, no protein target for ZTP has been identified. Here, we describe a role for the ZTP  
365 alarmone in activation of the ZagA zinc metallochaperone. ZagA is a ZTPase, and we  
366 suggest that ZTP is likely required for delivery of zinc to FolE, as supported by our  
367 bacterial two-hybrid studies, and perhaps to other client proteins.

368 The role of Z nucleotides is coordinated with the transcriptional response  
369 (regulated by Zur in *B. subtilis*) to zinc limitation (**Fig 7**). When *B. subtilis* experiences  
370 zinc deficiency, folate biosynthesis begins to fail due to a decrease in the activity of the  
371 zinc dependent GTP cyclohydrolase FolE and this elicits the accumulation of ZMP/ZTP.  
372 Concurrently, the ZagA metallochaperone is derepressed which can respond to ZTP by  
373 binding FolE, presumably for zinc delivery, thereby allowing for continued FolE activity  
374 and a restoration of folate biosynthesis. Eventually, as cells transitions from zinc  
375 deficiency to limitation, expression of the zinc independent FolE isozyme, *folE2*, is  
376 derepressed. FolEB allows for continued folate biosynthesis even as FolE fails.

377 Metallochaperones play a central role in metal homeostasis by delivering metal  
378 cofactors to their cognate proteins, thereby providing metal specificity as well as  
379 preventing toxicity associated with free cytosolic metal ions (20). The ZagA zinc  
380 metallochaperone belongs to subfamily 1 of the COG0523 family of G3E GTPases,  
381 proteins associated with the maturation of metal dependent proteins. COG0523 proteins  
382 are related to well characterized metallochaperones for nickel, including UreG (for  
383 urease) and HypB (for hydrogenase). The first characterized COG0523 protein

384 characterized was *Pseudomonas denitrificans* CobW, which is proposed to contribute to  
385 the delivery of cobalt into the cobalamin (Vitamin B12) cofactor (32). A second class of  
386 COG0523 proteins is comprised of nitrile hydratase (NHase) activators that facilitate the  
387 hydration of nitriles to amides utilizing either iron or cobalt (33).

388 The third class of COG0523 proteins is related to zinc homeostasis as hinted by  
389 their regulation by the zinc sensing metalloregulator, Zur. ZigA, a Zur regulated  
390 COG0523 protein from *A. baumannii*, is suggested to deliver zinc to histidine lyase  
391 thereby modulating cellular histidine levels, an intercellular zinc buffer (22). Recent  
392 results suggest that *A. baumannii* *zigA* mutants grown in conditions of zinc and iron  
393 depletion, as imposed by calprotectin, experience flavin rather than folate limitation.  
394 Flavin synthesis in this organism can be initiated by RibA, a Zn-dependent GTP  
395 cyclohydrolase II (GCHII), which appears to fail under conditions of Zn limitation (34).  
396 However, whether ZigA helps to metallate RibA and/or other specific client proteins is  
397 not yet established.

398 Our data suggest that the *B. subtilis* COG0523 protein, ZagA, is able to hydrolyse  
399 ZTP, as well as GTP (**Fig 4B**). Under folate limiting conditions, cellular ZTP and GTP  
400 levels are nearly equal, while ZMP levels accumulate dramatically. Thus, *in vivo*, ZagA  
401 and related enzymes may function with either nucleotide. We speculate that as Z  
402 nucleotide levels accumulate under zinc limiting conditions, and prior to the derepression  
403 of *folE2*, ZagA may utilize Z nucleotides preferentially. As folate biosynthesis is restored  
404 upon *folE2* derepression and Z nucleotide levels decrease (**Fig 3B**), ZagA may continue  
405 to function with GTP rather than ZTP. It is even possible, although highly speculative,  
406 that ZagA could recognize different client proteins depending on the bound nucleotide.

407            Genomic analysis offers insight into the cellular processes where ZagA and  
408 related metallochaperones may be required. ZagA-like proteins are often encoded near or  
409 within operons containing paralogs of zinc dependent proteins (19). Interestingly, the  
410 ZagA client protein is not the neighboring FolEB paralog, but rather the zinc containing  
411 FolE protein (**Fig 5A**). In other organisms, proteins predicted to fail under zinc starvation  
412 include those involved in heme, pyrimidine and amino acid biosynthesis. For instance,  
413 *Pseudomonas aeruginosa* encodes DksA2, a zinc independent paralog of DksA, which is  
414 an RNAP binding transcription factor required for appropriate response to amino acid  
415 starvation (the “stringent” response) (16). DksA contains a structural zinc binding site,  
416 whereas DksA2 does not. Thus, DksA2 can functionally substitute for DksA under  
417 conditions of zinc limitation or thiol stress (35, 36). By analogy with our observation that  
418 ZagA interacts with FolE, it is reasonable to hypothesize that the *P. aeruginosa*  
419 COG0523 protein may interact with the zinc containing DksA to ensure that the cell can  
420 mount an effective stringent response. Additionally, the link between DksA and  
421 COG0523 proteins also suggests a possible role for the alarmone, guanosine  
422 tetraphosphate (ppGpp) in the response to zinc limitation. Thus, the processes that fail as  
423 zinc levels become limiting for growth will likely be organism dependent and the proper  
424 delivery of zinc to the most critical client proteins may be determined by both the  
425 expression of specific COG0523 GTPases and their ability to respond to cellular effectors  
426 such as ZTP and perhaps other nucleotide alarmones.

427

428 **Materials and Methods**

429 **Strains and growth conditions.** Strains used in this study are listed in Table S1. Bacteria  
430 were grown in the media described in the following sections. When necessary, antibiotics  
431 were used at the following concentrations: chloramphenicol (3  $\mu\text{g ml}^{-1}$ ), kanamycin (15  
432  $\mu\text{g ml}^{-1}$ ), spectinomycin (100  $\mu\text{g ml}^{-1}$ ), and tetracycline (5  $\mu\text{g ml}^{-1}$ ). Additionally, metal  
433 starvation was induced by the addition of EDTA at the concentrations indicated.

434 Markerless in-frame deletion mutants were constructed from BKE strains as described  
435 previously (Koo et al., 2013). Briefly, BKE strains were acquired from the Bacillus  
436 Genetic Stock Center, chromosomal DNA was extracted, and the mutation, containing an  
437 *erm* cassette, was transformed into our wild-type (WT) strain 168. The *erm* cassette was  
438 subsequently removed by the introduction of plasmid pDR244, which was later cured by  
439 growing at the nonpermissive temperature of 42°C. Gene deletions were also constructed  
440 using long flanking homology PCR and chromosomal DNA transformation was  
441 performed as described (37).

442 **Gene expression analysis.** Cells were grown at 37 °C in MOPS-based minimal medium  
443 medium supplemented with 1% glucose and 20 amino acids (50  $\mu\text{g ml}^{-1}$ ) with rigorous  
444 shaking till  $\text{OD}_{600} \sim 0.4$ . 1 ml aliquots were treated with 1 mM EDTA for the indicated  
445 amount of time. Total RNA from both treated and untreated samples were extracted  
446 RNeasy Mini Kit following the manufacturer's instructions (Qiagen Sciences,  
447 Germantown, MD). RNA samples were then treated with Turbo-DNA free DNase  
448 (Ambion) and precipitated with ethanol overnight. RNA samples were re-dissolved in  
449 RNase-free water and quantified by NanoDrop spectrophotometer. 2  $\mu\text{g}$  total RNA from  
450 each sample was used for cDNA synthesis with TaqMan reverse transcription reagents  
451 (Applied Biosystems). qPCR was then carried out using iQ SYBR green supermix in an

452 Applied Biosystems 7300 Real Time PCR System. 23S rRNA was used as an internal  
453 control and fold-changes between treated and untreated samples were plotted.

454 **EDTA sensitivity assays.** For disk diffusion assays, strains were grown in LB at 37 °C  
455 with vigorous shaking to an OD<sub>600</sub>~0.4. A 100 µl aliquot of these cultures was added to 4  
456 ml of LB soft agar (0.7% agar) and poured on to prewarmed LB agar plates. The plates  
457 were then allowed to solidify for 10 minutes at room temperature in a laminar flow hood.  
458 Filter disks (6 mm) were placed on top of the agar and 5 µl of EDTA (500 mM) was  
459 added to the disks and allowed to absorb for 10 minutes. The plates were then incubated  
460 at 37 °C for 16-18 hours. The diameter of the zone of inhibition was measured. The data  
461 shown represent the values (diameter of the zone of inhibition minus diameter of the filter  
462 disk) and standard deviation of three biological replicates.

463 **Bacterial two hybrid assay.** The bacterial two-hybrid assay was performed as described  
464 previously (38). ZagA, FoleE, FoleE2 from *B. subtilis*, *A. baumannii* or *A. baylyi* and ZigA  
465 from *A. baumannii* were fused to the T18 or T25 catalytic domains of adenylate cyclase.  
466 Co-transformed strains of *E. coli BTH101* expressing combinations of T18 and T25  
467 vectors were plated on LB agar and incubated at 30°C for 48 hours. One milliliter of LB  
468 medium, supplemented with 100 µg ml<sup>-1</sup> of ampicillin, 50 µg ml<sup>-1</sup> of  
469 chloramphenicol and 0.5 mM of IPTG, was inoculated and incubated at 30°C to an  
470 OD<sub>600</sub>~0.4. One hundred microliters of the culture was mixed with prewarmed 4 ml of  
471 M9 medium supplemented with 1% glucose, 10 µg ml<sup>-1</sup>thiamine, appropriate antibiotics,  
472 0.5 mM IPTG and 40 µg ml<sup>-1</sup> Xgal. containing 0.75% agar. The soft agar was poured  
473 onto prewarmed M9 medium plates (1.5% agar) supplemented with 1% glucose, 10  
474 µg/ml thiamine containing appropriate antibiotics, 0.5 mM IPTG and 40 µg ml<sup>-1</sup> Xgal.

475 A Whatman filter disk impregnated with 5  $\mu$ M of 50 mg ml<sup>-1</sup> of trimethoprim was placed  
476 on the agar. The plates were incubated at 30°C overnight.

477 For quantitative  $\beta$ -galactosidase assays, cells were grown in M9 medium  
478 supplemented with 1% glucose, 10  $\mu$ g ml<sup>-1</sup> thiamine, appropriate antibiotics, 0.5 mM  
479 IPTG at 30°C from OD<sub>600</sub> ~0.02 to OD<sub>600</sub> ~0.4. One ml of culture was removed to tubes  
480 on ice containing 4 ml of Z buffer (0.06 M Na<sub>2</sub>HPO<sub>4</sub>·7 H<sub>2</sub>O, 0.04 M NaH<sub>2</sub>PO<sub>4</sub>·H<sub>2</sub>O, 0.01  
481 M KCl, 0.001 M MgSO<sub>4</sub>, 0.05 M  $\beta$ -mercaptoethanol) for at least 10 min and lysed by  
482 sonication.  $\beta$ -galactosidase activity was determined as described previously.

483 **Overexpression and purification of ZagA.** The *zagA* (*yciC*) gene was cloned using  
484 primers YciC-LIC-F:  
485 TACTTCCAATCCAATGCTATGAAAAAATTCCGGTTACCGT and YciC-LIC-R:  
486 TTATCCACTTCCAATGCTATTGATTCAGCTTCCATTAA and cloned in  
487 pMCSG19c using ligation independent cloning according to (39). The resulting clone  
488 was transformed into *E. coli* BL21(DE3) pLysS (40). One liter of liquid LB with 200  $\mu$ g  
489 ml<sup>-1</sup> ampicillin was inoculated with 1 ml of overnight culture and grown at 37°C to OD<sub>600</sub>  
490 of 0.4. The culture was cooled down to room temperature, IPTG was added to 0.3 mM,  
491 and then the culture was incubated at 14°C with shaking for 9 hours. Cells were collected  
492 by centrifugation and stored at -80° C. ZagA was purified using Ni-NTA beads (Prepase  
493 Histidine purification beads, Life Technologies) according to the manufacturer's  
494 recommendations. ZagA protein was further purified using an FPLC Superdex 200 sizing  
495 column using the buffer system, 50 mM Tris-HCl pH 8.0, 150 mM NaCl and 10%  
496 glycerol and stored at -80°C.

497 **GTPase activity assay.** GTPase activity was measured by the Malachite green assay  
498 (Sigma). Briefly, purified ZagA (1  $\mu$ M) was incubated with 0–1 mM GTP in assay buffer  
499 A in a volume of 90  $\mu$ L. After 90 min, 35  $\mu$ L of buffer B was added, incubated for 3 min,  
500 and reaction stopped by addition of 15  $\mu$ L 35% citric acid (Sigma) in 4 N HCl. After 30  
501 min, the absorbance at 680 nm was measured and the concentration of free phosphate  
502 was calculated using a standard curve.

503 **GTP cyclohydrolase activity assay.** GTP cyclohydrolase I activity was assessed in  
504 crude cell extracts essentially as previously described (28). This assay measures the  
505 formation of dihydroneopterin triphosphate from GTP. Crude cell extracts were  
506 incubated in a buffer containing 100 mM Tris-HCl pH8.5, 2.5 mM EDTA pH 8.0, 1 mM  
507 DTT, and 1 mM GTP (0.5 ml total reaction volume) at 42°C for 30 minutes. At the end  
508 of the reaction, an equal volume of activated charcoal (40  $\mu$ g ml<sup>-1</sup>) was added. The  
509 mixture was filtered through a 0.22  $\mu$ m syringe filter and washed sequentially with 5 ml  
510 of water, 5 ml of 5% ethanol, and 5 ml of 50% ethanol/3.1% NaOH. The concentration of  
511 neopterin triphosphate in the final wash was determined by fluorescence (265 nm  
512 excitation, 450 nm emission).

513 **Preparation of crude ribosomes.** *Bacillus subtilis* crude ribosomes were purified as  
514 previously described (23). Briefly, 500 ml of an OD<sub>600</sub> of ~0.4 LB or MM cultures were  
515 harvested and resuspended in buffer I (10 mM Tris [pH 7.6], 10 mM magnesium acetate,  
516 100 mM ammonium acetate, 6 mM  $\beta$ -mercaptoethanol (BME), 2 mM  
517 phenylmethylsulfonyl fluoride [PMSF]). Cells were then disrupted by a French press,  
518 after removal of cell debris, the supernatant was centrifuged for at 45,000 rpm and 4°C  
519 for 100 min in a Thermal Scientific Sorvall MTX 150 micro-ultracentrifuge. The

520 precipitate was dissolved in buffer II (20 mM Tris [pH 7.6], 15 mM magnesium acetate, 1  
521 M ammonium acetate, 6 mM BME, 2 mM PMSF) and centrifuged at 18,000 rpm for 60  
522 min at 4°C in a Thermal Scientific Sorvall MTX150 micro-ultracentrifuge. Then 2 ml  
523 aliquots of supernatant were layered onto 2 ml of buffer II containing a 30% (w/v)  
524 sucrose bed and centrifuged at 45,000 rpm for 3.5 h at 4°C. The precipitate was  
525 resuspended in buffer III (50 mM Tris-HCl, pH 8.0, 6 mM  $\beta$ -mercaptoethanol and 2 mM  
526 PMSF). Concentrations of purified ribosomes were quantified by absorbance (1 A<sub>260</sub> = a  
527 26 nM concentration of 70S ribosomes), and protein composition of the purified crude  
528 ribosomes are analyzed by mass spectrometry. Copies of ribosome per cell were  
529 calculated by combining ribosome concentrations, cell numbers and culture volume.  
530 Measurements were made with six independent preparations for wild-type (CU1065) and  
531 four preparations for the CU1065 derivative lacking the Zn-containing L31 and L33  
532 proteins (HB19657). Note that *B. subtilis* 168 contains two genes (*rpmGA* and *rpmGB*)  
533 encoding Zn-containing L33 proteins, and one pseudogene for a Zn-independent  
534 homolog (*rpmGC*). In the strains used in these studies, the L33\* pseudogene has had the  
535 frameshift corrected (*rpmGC*<sup>+</sup>) so it encodes a functional, Zur-regulated L33\* protein.

536 **Total cellular and ribosomal Zn concentration measurement by ICP-MS.** Cells were  
537 grown in LB medium or MM to an OD<sub>600</sub> of ~0.4, 5 ml and 500 ml cells from the same  
538 culture were harvested for measuring total cellular Zn content and ribosome associated  
539 Zn respectively. Cell numbers of the culture were quantified and crude ribosomes were  
540 purified as describe above. To measure total cellular Zn, four milliliter samples were  
541 collected before shock and at different time points after shock. Cells were washed twice  
542 with phosphate buffered saline (PBS) buffer containing 0.1 M EDTA followed by two



543 chelex-treated PBS buffer only washes. Cells were then resuspended in 400  $\mu$ l of chelex-  
544 treated PBS buffer from which 50  $\mu$ l was used for OD<sub>600</sub> measurement. 10  $\mu$ l of 10 mg/ml  
545 lysozyme (dissolved in PBS) was added to the remaining cells and incubated at 37°C for  
546 20 min. 600  $\mu$ l of 5% HNO<sub>3</sub> with 0.1% (v/v) Triton X-100 was added to the supernatant  
547 for total cellular samples or crude ribosome samples, which was boiled at 95°C for 30  
548 min. After centrifuging the samples again, the supernatant was diluted with 1% HNO<sub>3</sub>.  
549 Zn levels were measured by ICP-MS (Perkin Elmer ELAN DRC II using ammonia as the  
550 reaction gas and gallium as an internal standard) and normalized against total cell  
551 numbers. Data represent mean  $\pm$  SE of at least three separate experiments.

552 **Data availability.** All data supporting the findings of this study are presented in the  
553 figures or available from the corresponding author upon reasonable request.

554

555 **Acknowledgements:** We thank Dr. Ahmed Gaballa for providing the ZagA protein used  
556 in these studies. This work was supported by a grant from the National Institutes of  
557 Health (R35GM122461) to JDH.

558 **AUTHOR CONTRIBUTION.** Conception, PC, XH and JDH; Designed and performed  
559 experiments, PC and XH; Manuscript drafted and edited, PC and JDH.

560 **DECLARATION OF INTEREST.** The authors declare no competing interests.

561

562

## 563 **References**

- 564 1. Maret W, Li Y. 2009. Coordination dynamics of zinc in proteins. *Chem Rev*  
565 109:4682-707.
- 566 2. Cerasi M, Ammendola S, Battistoni A. 2013. Competition for zinc binding in  
567 the host-pathogen interaction. *Front Cell Infect Microbiol* 3:108.

- 568 3. Zackular JP, Chazin WJ, Skaar EP. 2015. Nutritional Immunity: S100 Proteins  
569 at the Host-Pathogen Interface. *J Biol Chem* 290:18991-8.
- 570 4. Chandrangsu P, Rensing C, Helmann JD. 2017. Metal homeostasis and  
571 resistance in bacteria. *Nat Rev Microbiol* 15:338-350.
- 572 5. Gaballa A, Helmann JD. 1998. Identification of a zinc-specific  
573 metalloregulatory protein, Zur, controlling zinc transport operons in *Bacillus*  
574 *subtilis*. *J Bacteriol* 180:5815-21.
- 575 6. Shin JH, Helmann JD. 2016. Molecular logic of the Zur-regulated zinc  
576 deprivation response in *Bacillus subtilis*. *Nat Commun* 7:12612.
- 577 7. Ma Z, Gabriel SE, Helmann JD. 2011. Sequential binding and sensing of Zn(II)  
578 by *Bacillus subtilis* Zur. *Nucleic Acids Res* 39:9130-8.
- 579 8. Gaballa A, Wang T, Ye RW, Helmann JD. 2002. Functional analysis of the  
580 *Bacillus subtilis* Zur regulon. *J Bacteriol* 184:6508-14.
- 581 9. Nanamiya H, Akanuma G, Natori Y, Murayama R, Kosono S, Kudo T,  
582 Kobayashi K, Ogasawara N, Park SM, Ochi K, Kawamura F. 2004. Zinc is a key  
583 factor in controlling alternation of two types of L31 protein in the *Bacillus*  
584 *subtilis* ribosome. *Mol Microbiol* 52:273-83.
- 585 10. Hensley MP, Tierney DL, Crowder MW. 2011. Zn(II) binding to *Escherichia*  
586 *coli* 70S ribosomes. *Biochemistry* 50:9937-9.
- 587 11. Gabriel SE, Helmann JD. 2009. Contributions of Zur-controlled ribosomal  
588 proteins to growth under zinc starvation conditions. *J Bacteriol* 191:6116-22.
- 589 12. Natori Y, Nanamiya H, Akanuma G, Kosono S, Kudo T, Ochi K, Kawamura F.  
590 2007. A fail-safe system for the ribosome under zinc-limiting conditions in  
591 *Bacillus subtilis*. *Mol Microbiol* 63:294-307.
- 592 13. Akanuma G, Nanamiya H, Natori Y, Nomura N, Kawamura F. 2006. Liberation  
593 of zinc-containing L31 (RpmE) from ribosomes by its paralogous gene  
594 product, YtiA, in *Bacillus subtilis*. *J Bacteriol* 188:2715-20.
- 595 14. Panina EM, Mironov AA, Gelfand MS. 2003. Comparative genomics of  
596 bacterial zinc regulons: enhanced ion transport, pathogenesis, and  
597 rearrangement of ribosomal proteins. *Proc Natl Acad Sci U S A* 100:9912-7.
- 598 15. Mikhaylina A, Ksibe AZ, Scanlan DJ, Blindauer CA. 2018. Bacterial zinc uptake  
599 regulator proteins and their regulons. *Biochem Soc Trans* 46:983-1001.
- 600 16. Blaby-Haas CE, Furman R, Rodionov DA, Artsimovitch I, de Crecy-Lagard V.  
601 2011. Role of a Zn-independent DksA in Zn homeostasis and stringent  
602 response. *Mol Microbiol* 79:700-15.
- 603 17. Dow A, Pristic S. 2018. Alternative ribosomal proteins are required for growth  
604 and morphogenesis of *Mycobacterium smegmatis* under zinc limiting  
605 conditions. *PLoS One* 13:e0196300.
- 606 18. Osman D, Martini MA, Foster AW, Chen J, Scott AJP, Morton RJ, Steed JW,  
607 Lurie-Luke E, Huggins TG, Lawrence AD, Deery E, Warren MJ, Chivers PT,  
608 Robinson NJ. 2019. Bacterial sensors define intracellular free energies for  
609 correct enzyme metalation. *Nat Chem Biol* doi:10.1038/s41589-018-0211-4.
- 610 19. Haas CE, Rodionov DA, Kropat J, Malasarn D, Merchant SS, de Crecy-Lagard V.  
611 2009. A subset of the diverse COG0523 family of putative metal chaperones  
612 is linked to zinc homeostasis in all kingdoms of life. *BMC Genomics* 10:470.

- 613 20. Capdevila DA, Edmonds KA, Giedroc DP. 2017. Metallochaperones and  
614 metalloregulation in bacteria. *Essays Biochem* 61:177-200.
- 615 21. Blaby-Haas CE, Flood JA, Crecy-Lagard V, Zamble DB. 2012. YeiR: a metal-  
616 binding GTPase from *Escherichia coli* involved in metal homeostasis.  
617 *Metallomics* 4:488-97.
- 618 22. Nairn BL, Lonergan ZR, Wang J, Braymer JJ, Zhang Y, Calcutt MW, Lisher JP,  
619 Gilston BA, Chazin WJ, de Crecy-Lagard V, Giedroc DP, Skaar EP. 2016. The  
620 Response of *Acinetobacter baumannii* to Zinc Starvation. *Cell Host Microbe*  
621 19:826-36.
- 622 23. Sankaran B, Bonnett SA, Shah K, Gabriel S, Reddy R, Schimmel P, Rodionov  
623 DA, de Crecy-Lagard V, Helmann JD, Iwata-Reuyl D, Swairjo MA. 2009. Zinc-  
624 independent folate biosynthesis: genetic, biochemical, and structural  
625 investigations reveal new metal dependence for GTP cyclohydrolase IB. *J*  
626 *Bacteriol* 191:6936-49.
- 627 24. Ahmad SI, Kirk SH, Eisenstark A. 1998. Thymine metabolism and thymineless  
628 death in prokaryotes and eukaryotes. *Annu Rev Microbiol* 52:591-625.
- 629 25. Stepanek JJ, Schakermann S, Wenzel M, Prochnow P, Bandow JE. 2016. Purine  
630 biosynthesis is the bottleneck in trimethoprim-treated *Bacillus subtilis*.  
631 *Proteomics Clin Appl* 10:1036-1048.
- 632 26. Bochner BR, Ames BN. 1982. ZTP (5-amino 4-imidazole carboxamide  
633 riboside 5'-triphosphate): a proposed alarmone for 10-formyl-  
634 tetrahydrofolate deficiency. *Cell* 29:929-37.
- 635 27. Kim PB, Nelson JW, Breaker RR. 2015. An ancient riboswitch class in bacteria  
636 regulates purine biosynthesis and one-carbon metabolism. *Mol Cell* 57:317-  
637 28.
- 638 28. Babitzke P, Gollnick P, Yanofsky C. 1992. The *mtrAB* operon of *Bacillus*  
639 *subtilis* encodes GTP cyclohydrolase I (MtrA), an enzyme involved in folic  
640 acid biosynthesis, and MtrB, a regulator of tryptophan biosynthesis. *J*  
641 *Bacteriol* 174:2059-64.
- 642 29. Rattan R, Giri S, Singh AK, Singh I. 2005. 5-Aminoimidazole-4-carboxamide-1-  
643 beta-D-ribofuranoside inhibits cancer cell proliferation in vitro and in vivo  
644 via AMP-activated protein kinase. *J Biol Chem* 280:39582-93.
- 645 30. Bazurto JV, Downs DM. 2014. Amino-4-imidazolecarboxamide ribotide  
646 directly inhibits coenzyme A biosynthesis in *Salmonella enterica*. *J Bacteriol*  
647 196:772-9.
- 648 31. Dougherty MJ, Boyd JM, Downs DM. 2006. Inhibition of fructose-1,6-  
649 bisphosphatase by aminoimidazole carboxamide ribotide prevents growth of  
650 *Salmonella enterica* *purH* mutants on glycerol. *J Biol Chem* 281:33892-9.
- 651 32. Crouzet J, Levy-Schil S, Cameron B, Cauchois L, Rigault S, Rouyez MC, Blanche  
652 F, Debussche L, Thibaut D. 1991. Nucleotide sequence and genetic analysis of  
653 a 13.1-kilobase-pair *Pseudomonas denitrificans* DNA fragment containing  
654 five *cob* genes and identification of structural genes encoding Cob(I)alamin  
655 adenosyltransferase, cobyrinic acid synthase, and bifunctional cobinamide  
656 kinase-cobinamide phosphate guanylyltransferase. *J Bacteriol* 173:6074-87.
- 657 33. Nojiri M, Yohda M, Odaka M, Matsushita Y, Tsujimura M, Yoshida T, Dohmae  
658 N, Takio K, Endo I. 1999. Functional expression of nitrile hydratase in

- 659 Escherichia coli: requirement of a nitrile hydratase activator and post-  
660 translational modification of a ligand cysteine. J Biochem 125:696-704.
- 661 34. Wang J, Lonergan ZR, Gonzalez-Gutierrez G, Nairn BL, Maxwell CN, Zhang Y,  
662 Andreini C, Karty JA, Chazin WJ, Trinidad JC, Skaar EP, Giedroc DP. 2019.  
663 Multi-metal Restriction by Calprotectin Impacts De Novo Flavin Biosynthesis  
664 in Acinetobacter baumannii. Cell Chemical Biology in press.
- 665 35. Crawford MA, Tapscott T, Fitzsimmons LF, Liu L, Reyes AM, Libby SJ, Trujillo  
666 M, Fang FC, Radi R, Vazquez-Torres A. 2016. Redox-Active Sensing by  
667 Bacterial DksA Transcription Factors Is Determined by Cysteine and Zinc  
668 Content. MBio 7:e02161-15.
- 669 36. Henard CA, Tapscott T, Crawford MA, Husain M, Doulias PT, Porwollik S, Liu  
670 L, McClelland M, Ischiropoulos H, Vazquez-Torres A. 2014. The 4-cysteine  
671 zinc-finger motif of the RNA polymerase regulator DksA serves as a thiol  
672 switch for sensing oxidative and nitrosative stress. Mol Microbiol 91:790-  
673 804.
- 674 37. Mascher T, Margulis NG, Wang T, Ye RW, Helmann JD. 2003. Cell wall stress  
675 responses in Bacillus subtilis: the regulatory network of the bacitracin  
676 stimulon. Mol Microbiol 50:1591-604.
- 677 38. Karimova G, Pidoux J, Ullmann A, Ladant D. 1998. A bacterial two-hybrid  
678 system based on a reconstituted signal transduction pathway. Proc Natl Acad  
679 Sci U S A 95:5752-6.
- 680 39. Donnelly MI, Zhou M, Millard CS, Clancy S, Stols L, Eschenfeldt WH, Collart FR,  
681 Joachimiak A. 2006. An expression vector tailored for large-scale, high-  
682 throughput purification of recombinant proteins. Protein Expr Purif 47:446-  
683 54.
- 684 40. Studier FW. 1991. Use of bacteriophage T7 lysozyme to improve an inducible  
685 T7 expression system. J Mol Biol 219:37-44.
- 686

687

## 688 **Figures**

689

690 **Figure 1. Purine biosynthesis is the major metabolic bottleneck caused by folate**  
691 **limitation during zinc starvation.** Growth curves of wild type (A) and a *folE2* mutant  
692 (B) in the presence or absence of EDTA (50  $\mu$ M) with or without inosine (100  $\mu$ M)  
693 supplementation. (C) Diagram of ZMP producing pathways. Dashed arrows indicate  
694 multiple steps. Abbreviations: PRPP=phosphoribosyl pyrophosphate, His=histidine,  
695 DHF=dihydrofolic acid, THF=tetrahydrofolate, 10f-THF=10-formyl tetrahydrofolate,  
696 AICAR=5-Aminoimidazole-4-carboxamide ribonucleotide.

697

698 **Figure 2. ZMP accumulation protects cells from zinc starvation.** EDTA sensitivity of  
699 *purH*, *purB* and *purB purH* mutants in wild-type (A) or *znuABC* mutant (B) backgrounds  
700 as measured by disk diffusion assay.

701

702 **Figure 3. Z nucleotides accumulate under conditions of zinc starvation.** (A)  
703 Schematic representation of the *pfl* riboswitch-*lacZ* reporter construct. (B) Induction of  
704 the *pfl* riboswitch-*lacZ* fusion in response to an EDTA impregnated disk. (C) Induction of  
705 the *pfl* riboswitch-*lacZ* fusion and derepression of the Zur regulon as a function of time  
706 after EDTA (250  $\mu$ M) addition.

707

708 **Figure 4. ZagA hydrolyzes ZTP.** (A) EDTA sensitivity of *zagA*, *purH*, *purB*, *zagA*  
709 *purH*, and *zagA purB* mutants as measured by disk diffusion assay. (B) ZagA nucleotide

710 hydrolysis activity as measured by the Malachite green assay. (C) Inhibition of ZagA

711 ZTPase activity by addition of the non-hydrolyzable GTP analog, GDP-NP. (D)

712 Inhibition of ZagA GTPase activity by addition of ZMP.

713

714 **Figure 5. Z nucleotide accumulation stimulates the ZagA-FolE interaction.** (A) Disk

715 diffusion assays of *E. coli* strains containing the ZagA, FolE, FolE2 bacterial two hybrid

716 constructs in the presence of trimethoprim (TMP). (B)  $\beta$ -galactosidase activity of the

717 ZagA and FolE bacterial two hybrid constructs after 30 min of treatment with TMP.

718 (C)  $\beta$ -galactosidase activity of the ZagA and FolE from *B. subtilis* (*Bsu*), ZigA from *A.*

719 *baumanii* (*Abau*), or ZigA from *A. baylyi* (*Abay*) bacterial two hybrid constructs after 30

720 min of treatment with TMP. (D) Complementation of the EDTA sensitivity of *B. subtilis*

721 *zagA* mutant with *B. subtilis* or *A. baylyi zagA* or *A. baumannii zagA*.

722

723 **Figure 6. ZagA accesses a ribosome associated zinc pool to support FolE-dependent**

724 **GTP cyclohydrolase activity.** GTP cyclohydrolase I specific activity after EDTA

725 exposure (250  $\mu$ M) in crude cell lysates of *B. subtilis* WT, *zagA*, *folE2*, *rpmE*, *rpmE2*,

726 *zagA rpmE*, and *zagA rpmE2* mutants as measured by fluorescence (265 nm excitation,

727 450 emission).

728

729 **Figure 7. Proposed model of the role of Z nucleotides in the response to zinc**

730 **limitation.** As cells experience zinc limitation, the Zur regulon is derepressed in three

731 distinct waves. The first set of genes to be derepressed (omitted for clarity) includes the

732 zinc independent r-protein paralog L31\* (*rpmEB*). (1) L31\* can then displace the zinc

733 containing L31 r-protein from the ribosome. As zinc availability continues to decrease,  
734 (2) *zagA* (formerly *yciC*) expression is induced. Concurrently, (3) FolE activity begins to  
735 decline leading to a decrease in 10f-THF, the substrate for the purine biosynthetic  
736 enzyme PurH. As a result, (4) ZMP accumulates and is converted to ZTP. (5) ZTP  
737 stimulates *ZagA* activity and allows for *ZagA* interaction with FolE, which allows for  
738 continued folate production in the presence of zinc limitation. (6) If cells, continue to  
739 experience zinc limitation, the final set of Zur regulated genes is derepressed, which  
740 includes *folEB*, encoding a zinc independent paralog of FolE. (7) FolEB is able to  
741 functionally replace the inactive FolE and, as a result, (8) ZMP levels decline as the  
742 purine biosynthetic pathway is functional.

743

**Fig 1**

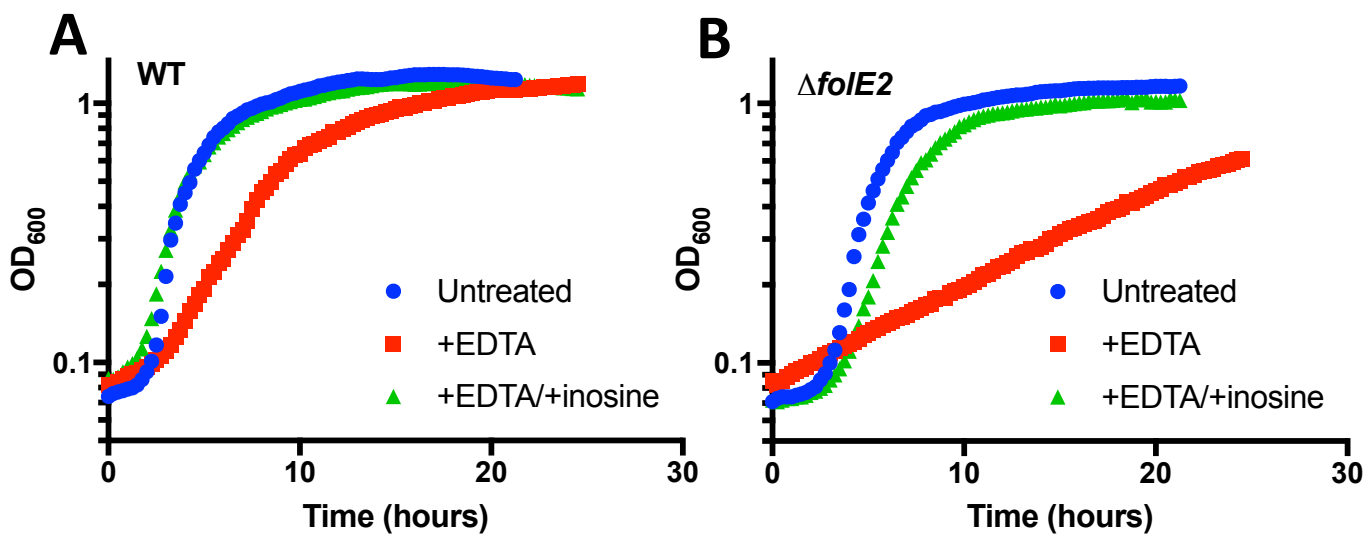

**C**

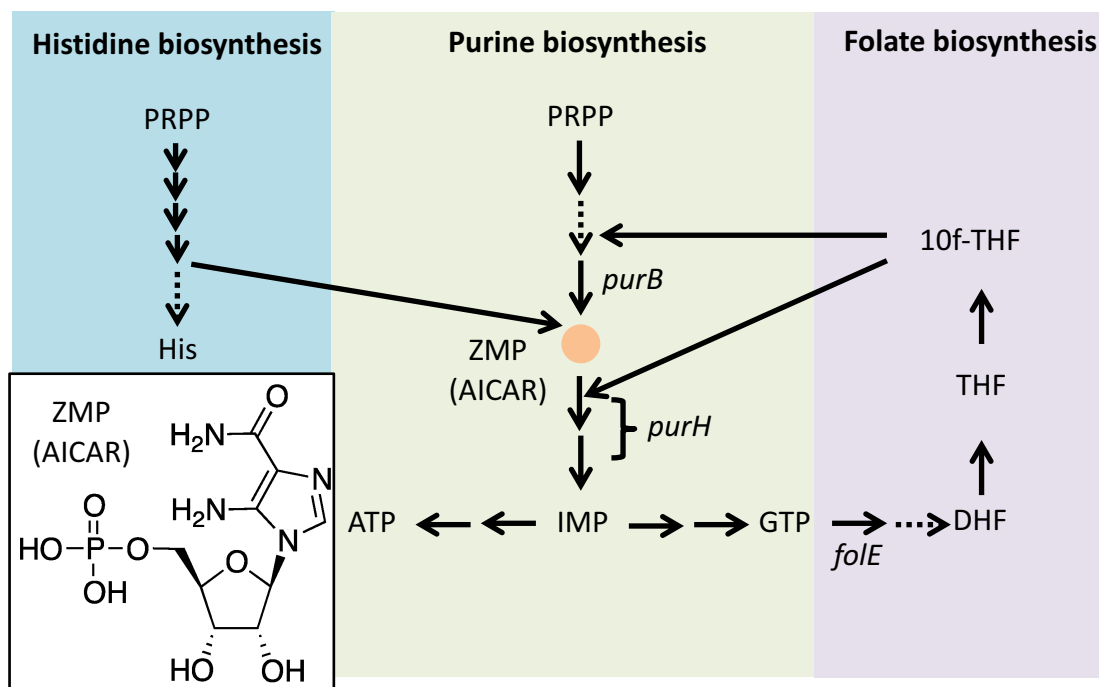



**Figure 1. Purine biosynthesis is the major metabolic bottleneck caused by folate limitation during zinc starvation.** Growth curves of wild type (A) and a *foIE2* mutant (B) in the presence or absence of EDTA (50 mM) or inosine (100 mM) supplementation. (C) Diagram of ZMP producing pathways. Dashed arrows indicate multiple steps. Abbreviations: PRPP=phosphoribosyl pyrophosphate, His=histidine, DHF=dihydrofolic acid, THF=tetrahydrofolate, 10f-THF=10-formyl tetrahydrofolate, AICAR=5-Aminoimidazole-4-carboxamide ribonucleotide.

**Fig 2**

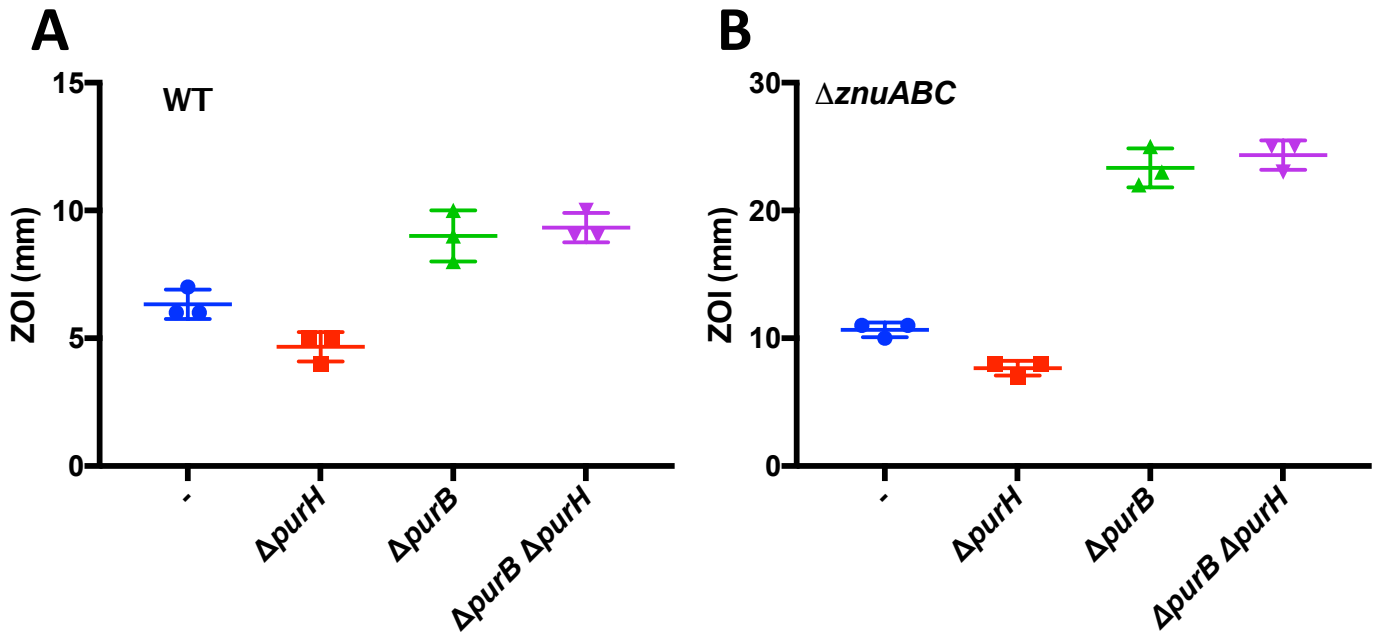

**Figure 2. ZMP accumulation protects cells from zinc starvation.** EDTA sensitivity of *purH*, *purB* and *purB purH* mutants in wild-type (A) or *znuABC* mutant (B) backgrounds as measured by disk diffusion assay.

**Fig 3**

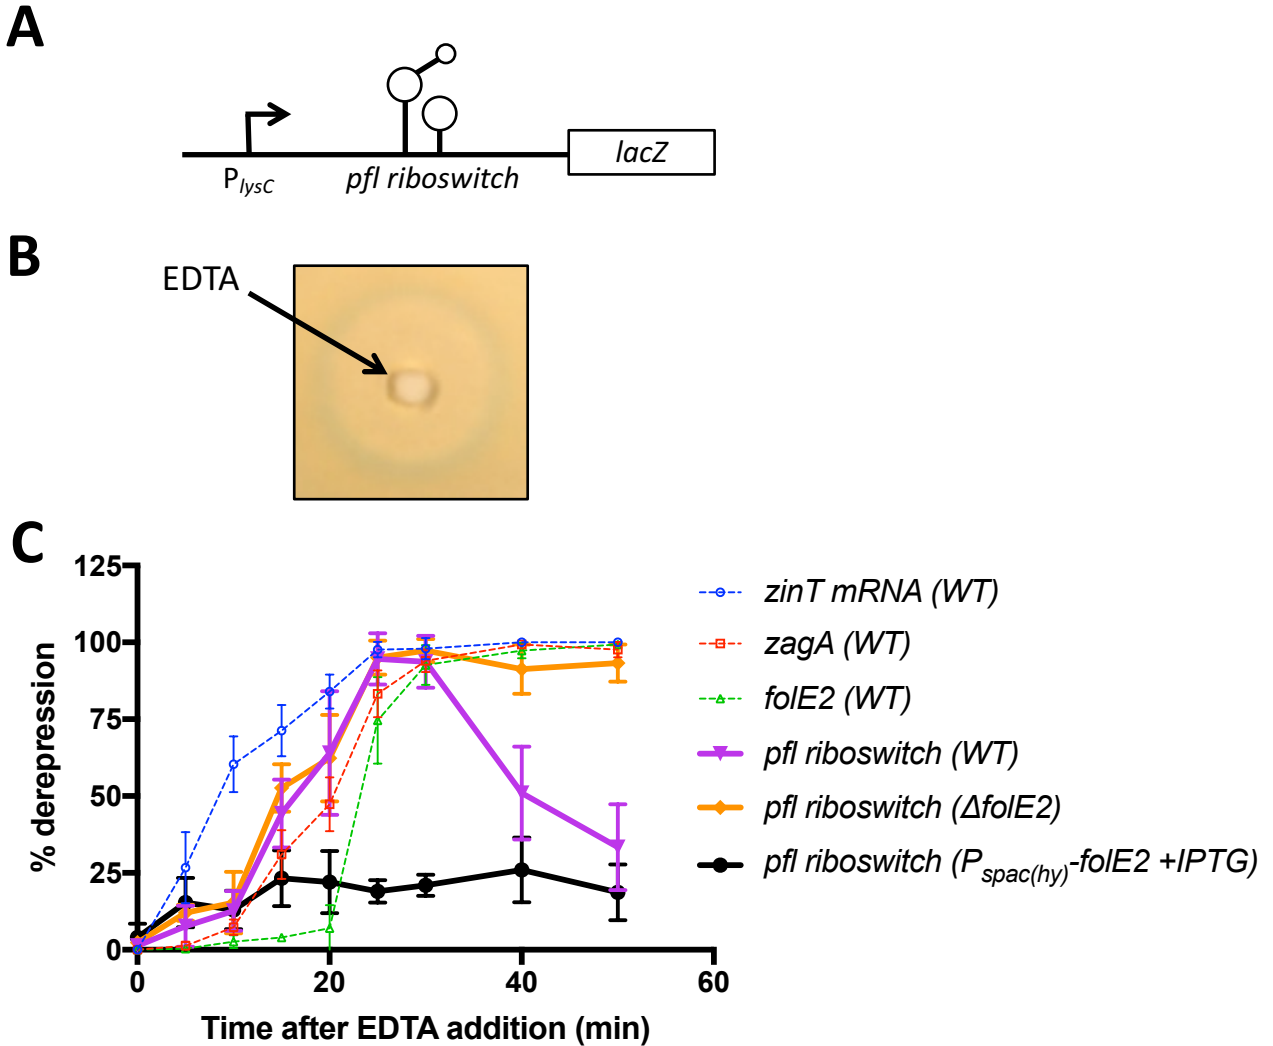

**Figure 3. Z nucleotides accumulate under conditions of zinc starvation.** (A) Schematic representation of the *pfl* riboswitch-*lacZ* reporter construct. (B) Induction of the *pfl* riboswitch-*lacZ* fusion in response to an EDTA impregnated disk. (C) Induction of the *pfl* riboswitch-*lacZ* fusion and derepression of the Zur regulon as a function of time after EDTA (250 mM) addition.

**Fig 4**

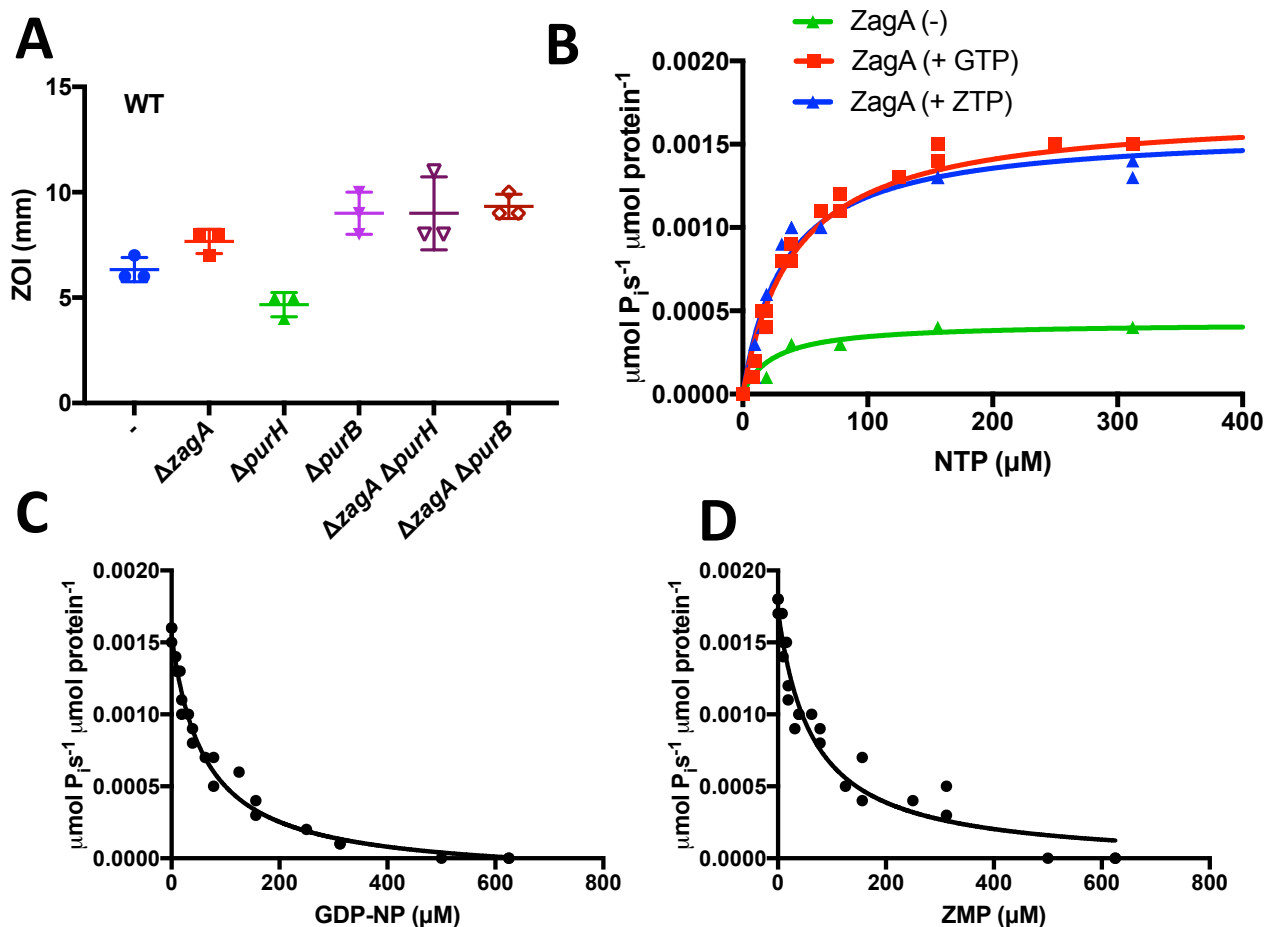

**Figure 4. ZagA hydrolyzes ZTP.** (A) EDTA sensitivity of *zagA*, *purH*, *purB*, *zagA purH*, and *zagA purB* mutants as measured by disk diffusion assay. (B) ZagA nucleotide hydrolysis activity as measured by the Malachite green assay. (C) Inhibition of ZagA ZTPase activity by addition of the non-hydrolyzable GTP analog, GDP-NP. (D) Inhibition of ZagA GTPase activity by addition of ZMP.

# Fig 5

## A

Trimethoprim

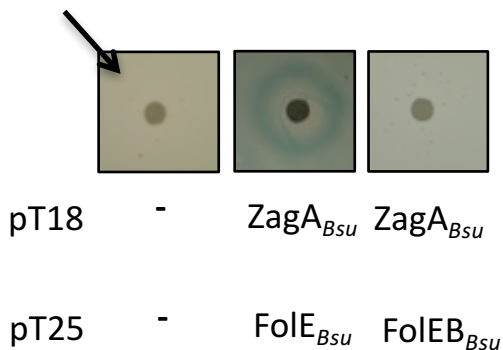

## B

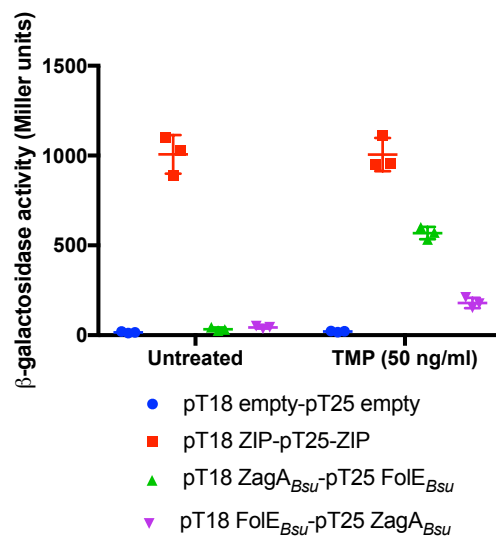

## C

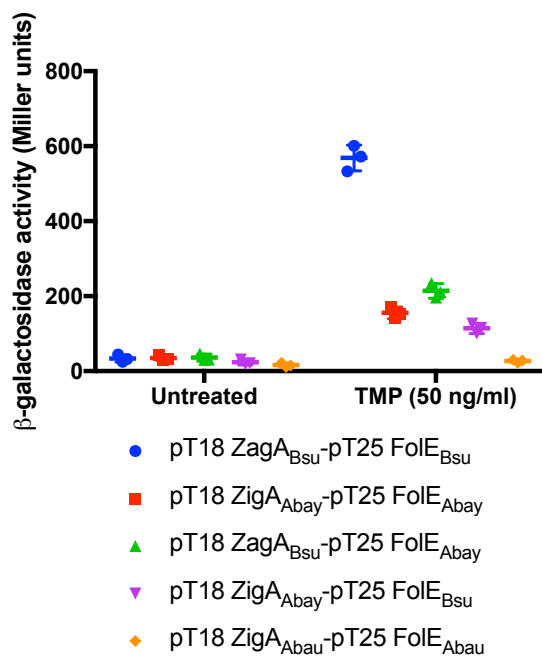

## D

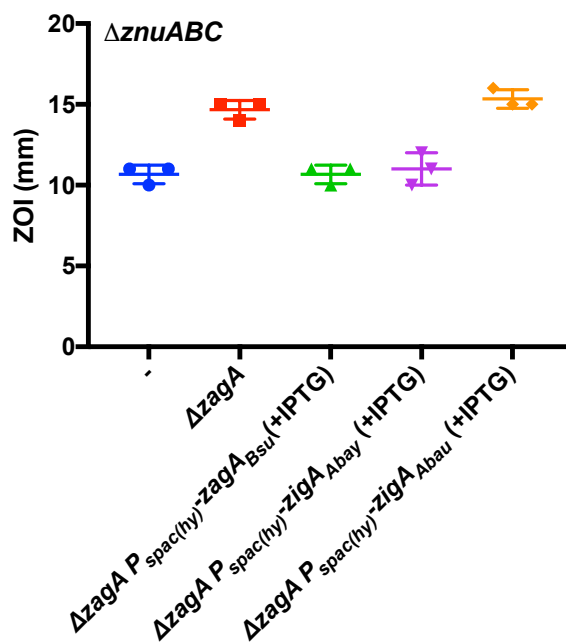

**Figure 5. Z nucleotide accumulation stimulates the YciC-FoIE interaction.** (A) Disk diffusion assays of *E. coli* strains containing the ZagA, FoIE, FoIE2 bacterial two hybrid constructs in the presence of trimethoprim (TMP). (B)  $\beta$ -galactosidase activity of the ZagA and FoIE bacterial two hybrid constructs after 30 min of treatment with TMP. (C)  $\beta$ -galactosidase activity of the ZagA and FoIE from *B. subtilis* (*Bsu*), *A. baumannii* (*Abau*), or *A. baylyi* (*Abay*) bacterial two hybrid constructs after 30 min of treatment with TMP. (D) Complementation of the EDTA sensitivity of *B. subtilis zagA* mutant with *B. subtilis* or *A. baylyi zagA* or *A. baumannii zagA*.

**Fig 6**

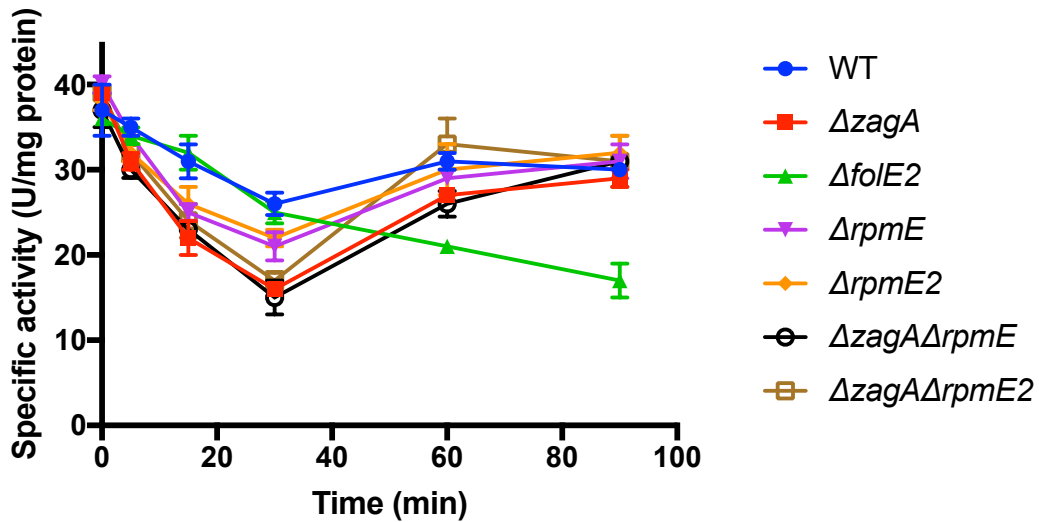

**Figure 6. ZagA can access a ribosome associated zinc pool to support FoIE GTP cyclohydrolase activity.** GTP cyclohydrolase I activity in crude cell lysates of *B. subtilis* WT, *zagA*, *foIE2*, *rpmE*, *rpmE2*, *zagA rpmE*, and *zagA rpmE2* mutants as measured by the conversion of GTP to neopterin triphosphate as monitored by fluorescence (265 nm excitation, 450 emission).

# Fig 7

[Zn]

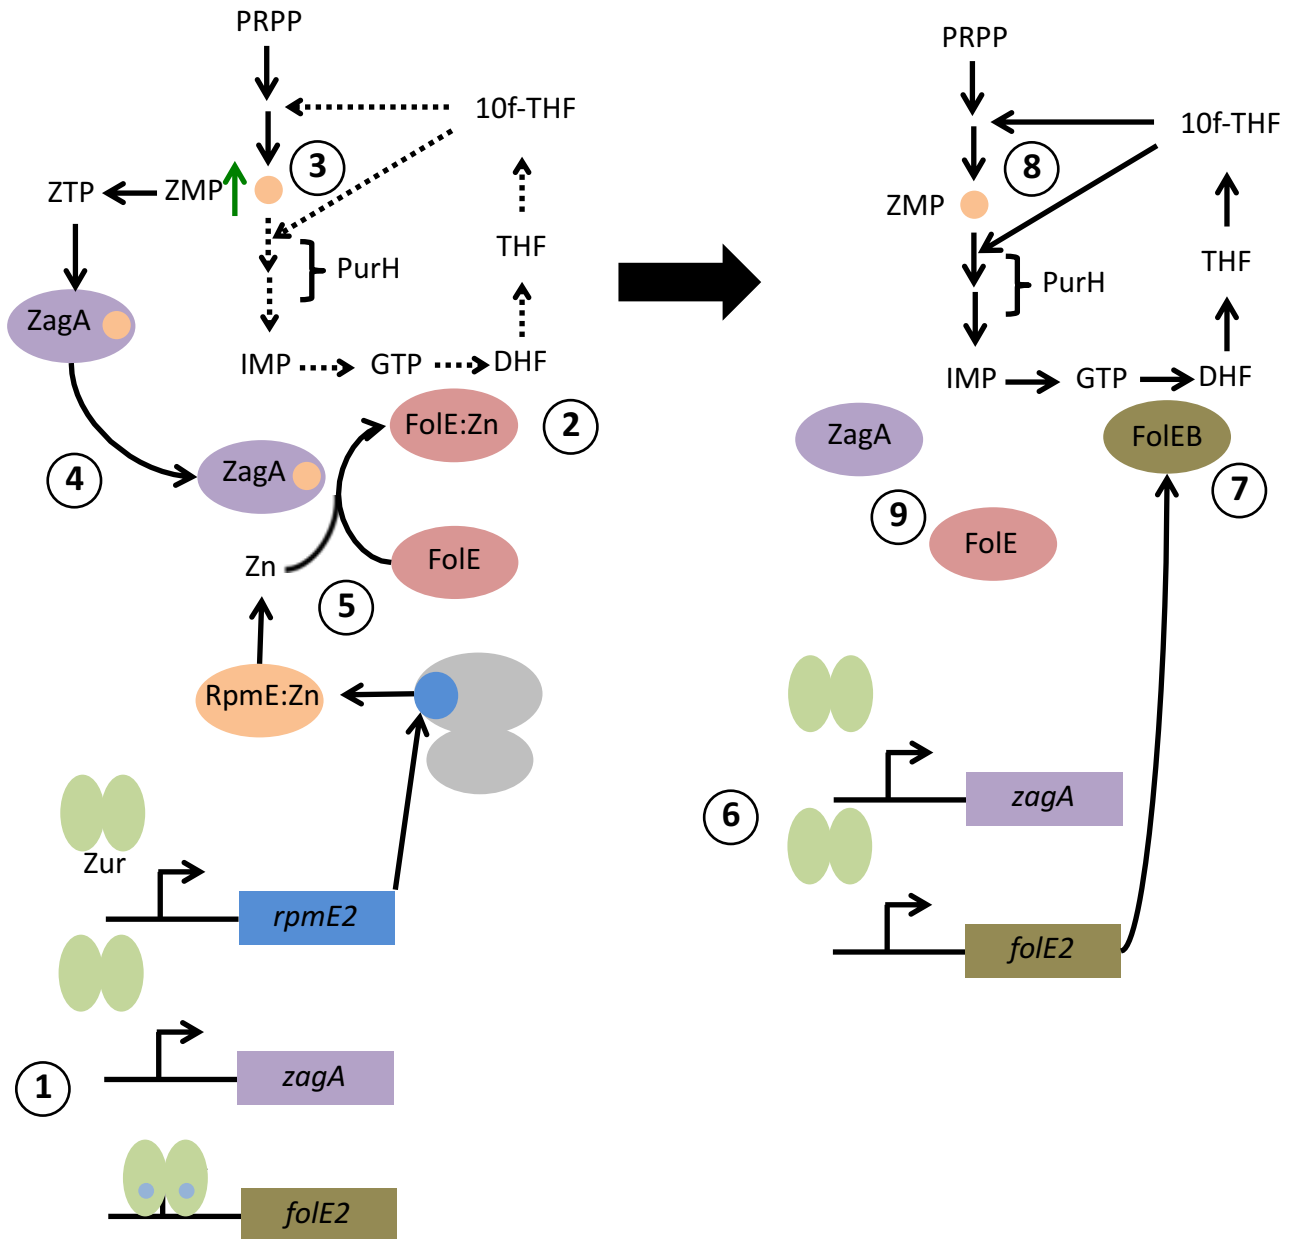

Figure 6. Proposed model of the role of Z nucleotides in the response to zinc limitation.



**Figure 7. Proposed model of the role of Z nucleotides in the response to zinc limitation.** As cells experience zinc limitation, the Zur regulon is derepressed in three distinct waves. The first set of genes to be derepressed (omitted for clarity) includes the zinc independent r-protein paralog L31\* (*rpmEB*). (1) L31\* can then displace the zinc containing L31 r-protein from the ribosome. As zinc availability continues to decrease, (2) *zagA* (formerly *yciC*) expression is induced. Concurrently, (3) FoLE activity begins to decline leading to a decrease in 10f-THF, the substrate for the purine biosynthetic enzyme PurH. As a result, (4) ZMP accumulates and is converted to ZTP. (5) ZTP stimulates ZagA activity and allows for ZagA interaction with FoLE, which allows for continued folate production in the presence of zinc limitation. (6) If cells, continue to experience zinc limitation, the final set of Zur regulated genes is derepressed, which includes *foIEB*, encoding a zinc independent paralog of FoLE. (7) FoIEB is able to functionally replace the inactive FoLE and, as a result, (8) ZMP levels decline as the purine biosynthetic pathway is functional.

**Table S1: Strains used in this study**

| Strain             | Genotype                                                                                                                                                              |
|--------------------|-----------------------------------------------------------------------------------------------------------------------------------------------------------------------|
| <b>B. subtilis</b> |                                                                                                                                                                       |
| CU1065             | <i>trpC2 attSPβ sfp<sup>0</sup> [DHB(G)<sup>+</sup>]</i> , Lab stock                                                                                                  |
| HB20101            | CU1065 $\Delta$ <i>folE2</i>                                                                                                                                          |
| HB20102            | CU1065 $\Delta$ <i>purH</i>                                                                                                                                           |
| HB20103            | CU1065 $\Delta$ <i>purB</i>                                                                                                                                           |
| HB20104            | CU1065 $\Delta$ <i>purB</i> $\Delta$ <i>purH</i>                                                                                                                      |
| HB20105            | CU1065 $\Delta$ <i>znuABC</i>                                                                                                                                         |
| HB20106            | CU1065 $\Delta$ <i>znuABC</i> $\Delta$ <i>purH</i>                                                                                                                    |
| HB20107            | CU1065 $\Delta$ <i>znuABC</i> $\Delta$ <i>purB</i>                                                                                                                    |
| HB20108            | CU1065 $\Delta$ <i>znuABC</i> $\Delta$ <i>purB</i> $\Delta$ <i>purH</i>                                                                                               |
| HB20117            | CU1065 <i>amyE::pfl</i> riboswitch- <i>lacZ</i>                                                                                                                       |
| HB20118            | CU1065 <i>amyE::pfl</i> riboswitch- <i>lacZ</i> $\Delta$ <i>folE2</i>                                                                                                 |
| HB20119            | CU1065 <i>amyE::pfl</i> riboswitch- <i>lacZ</i> $\Delta$ <i>folE2</i> <i>thrC::Pspac(hy)-folE2</i>                                                                    |
| HB20135            | CU1065 $\Delta$ <i>zagA</i>                                                                                                                                           |
| HB20136            | CU1065 $\Delta$ <i>zagA</i> $\Delta$ <i>purH</i>                                                                                                                      |
| HB20137            | CU1065 $\Delta$ <i>zagA</i> $\Delta$ <i>purB</i>                                                                                                                      |
| HB20138            | CU1065 $\Delta$ <i>zagA</i> <i>amyE::P<sub>spac</sub>(hy)-zagA(Bsu)</i>                                                                                               |
| HB20139            | CU1065 $\Delta$ <i>zagA</i> <i>amyE::P<sub>spac</sub>(hy)-zagA(Abay)</i>                                                                                              |
| HB20140            | CU1065 $\Delta$ <i>zagA</i> <i>amyE::P<sub>spac</sub>(hy)-zagA(Abau)</i>                                                                                              |
| HB20141            | CU1065 $\Delta$ <i>rpmE</i>                                                                                                                                           |
| HB20142            | CU1065 $\Delta$ <i>rpmEB</i>                                                                                                                                          |
| HB20143            | CU1065 $\Delta$ <i>zagA</i> $\Delta$ <i>rpmE</i>                                                                                                                      |
| HB20144            | CU1065 $\Delta$ <i>zagA</i> $\Delta$ <i>rpmEB</i>                                                                                                                     |
| HB19657            | CU1065 <i>rpmGA::tet rpmGB::mIs rpmE::spc rpmGC<sup>+</sup></i>                                                                                                       |
| HB19670            | CU1065 <i>rpmEB::tet rpmGC<sup>+</sup> sacA::P<sub>folE2</sub>-lux</i>                                                                                                |
| HB19672            | CU1065 <i>rpmE::spc rpmGC<sup>+</sup> sacA::P<sub>folE2</sub>-lux</i>                                                                                                 |
| <b>E. coli</b>     |                                                                                                                                                                       |
| DHP1               | DH1 (F <sup>-</sup> , <i>glnV44(AS)</i> , <i>recA1</i> , <i>endA1</i> , <i>gyrA96 (Nal<sup>r</sup>)</i> , <i>thi1</i> , <i>hsdR17</i> , <i>spoT1</i> , <i>rfdD1</i> ) |
| HE20101            | DHP1 pT18-empty, pT25 empty                                                                                                                                           |
| HE20102            | DHP1 pT18 ZIP, pT25-ZIP                                                                                                                                               |
| HE20103            | DHP1 pT18 ZagA(Bsu), pT25-FolE(Bsu)                                                                                                                                   |
| HE20104            | DHP1 pT18 FolE(Bsu), pT25-ZagA(Bsu)                                                                                                                                   |
| HE20105            | DHP1 pT18 ZagA(Abay), pT25 FolE(Abay)                                                                                                                                 |
| HE20106            | DHP1 pT18 ZagA(Bsu), pT25 FolE(Abay)                                                                                                                                  |
| HE20107            | DHP1 pT18 ZagA(Abay), pT25 FolE(Bsu)                                                                                                                                  |
| HE20108            | DHP1 pT18 ZagA(Abau), pT25FolE(Abau)                                                                                                                                  |

**Fig S1**

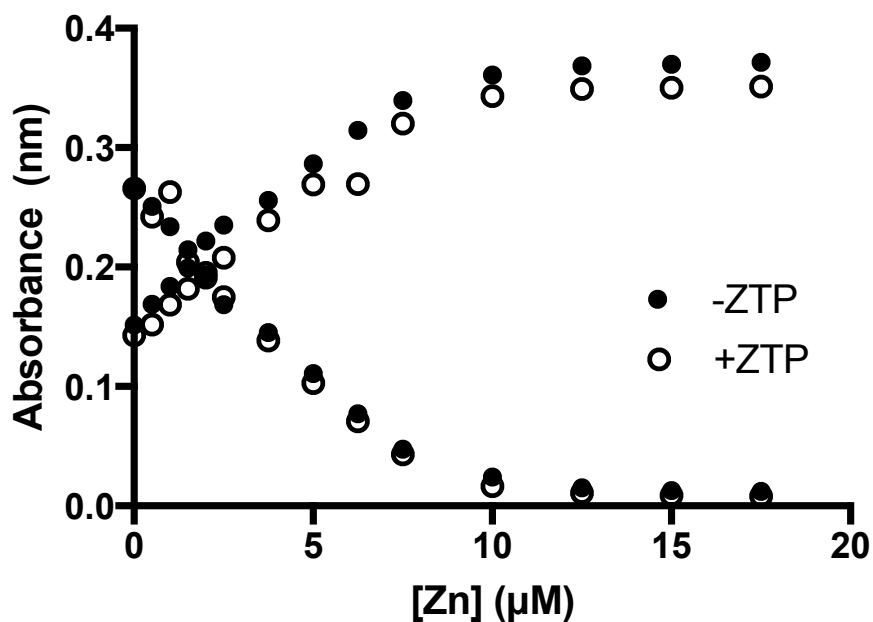

**Figure S1. ZTP does not bind zinc with high affinity.** Zinc was titrated into a mixture of 2 μM Magfura-2 without (filled circles) and with 10 μM ZTP (open circles). Absorbances at 325 nm (increasing values) and 366 nm (decreasing values) were plotted.

Fig S2

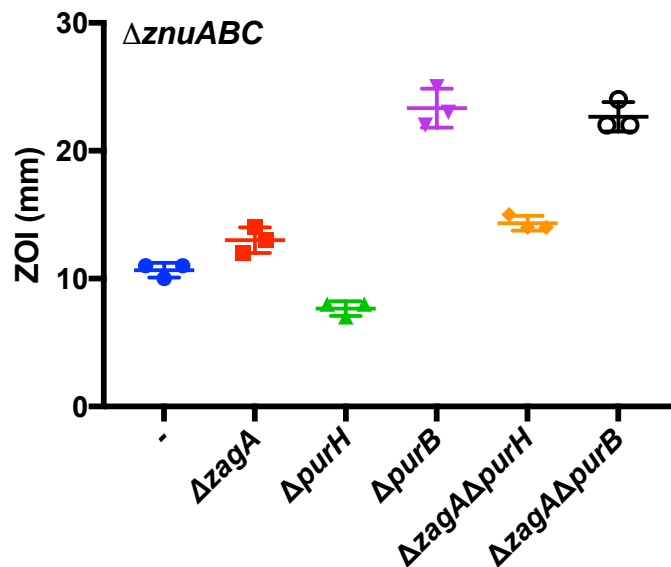

**Figure S2. The protective effect of ZTP accumulation requires ZagA.** EDTA sensitivity of *zagA*, *purH*, *purB* and *zagA purH*, and *zagA purB* mutants in a *znuABC* mutant background as measured by disk diffusion assay.

**Fig S3**

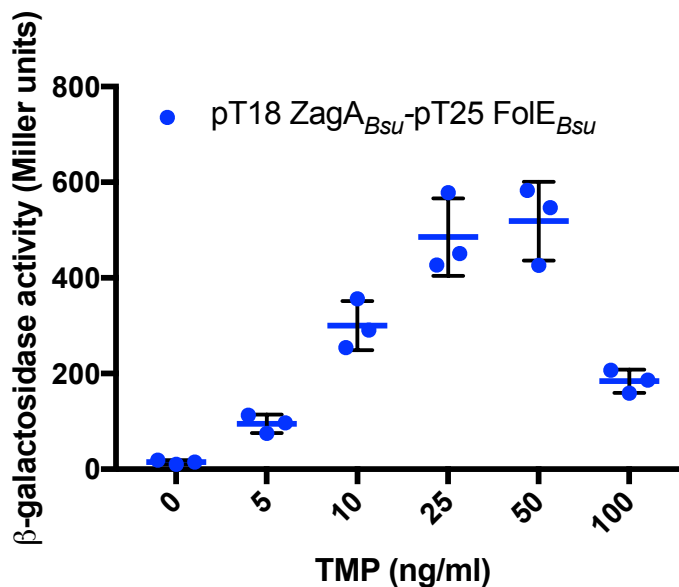

**Figure S3. The ZagA-FolE interaction in response to trimethoprim is concentration dependent.**  $\beta$ -galactosidase activity of the ZagA and FolE bacterial two hybrid constructs after 30 min of treatment with various concentrations of trimethoprim (TMP).

# Fig S4

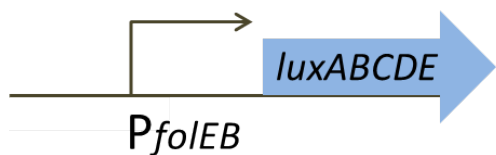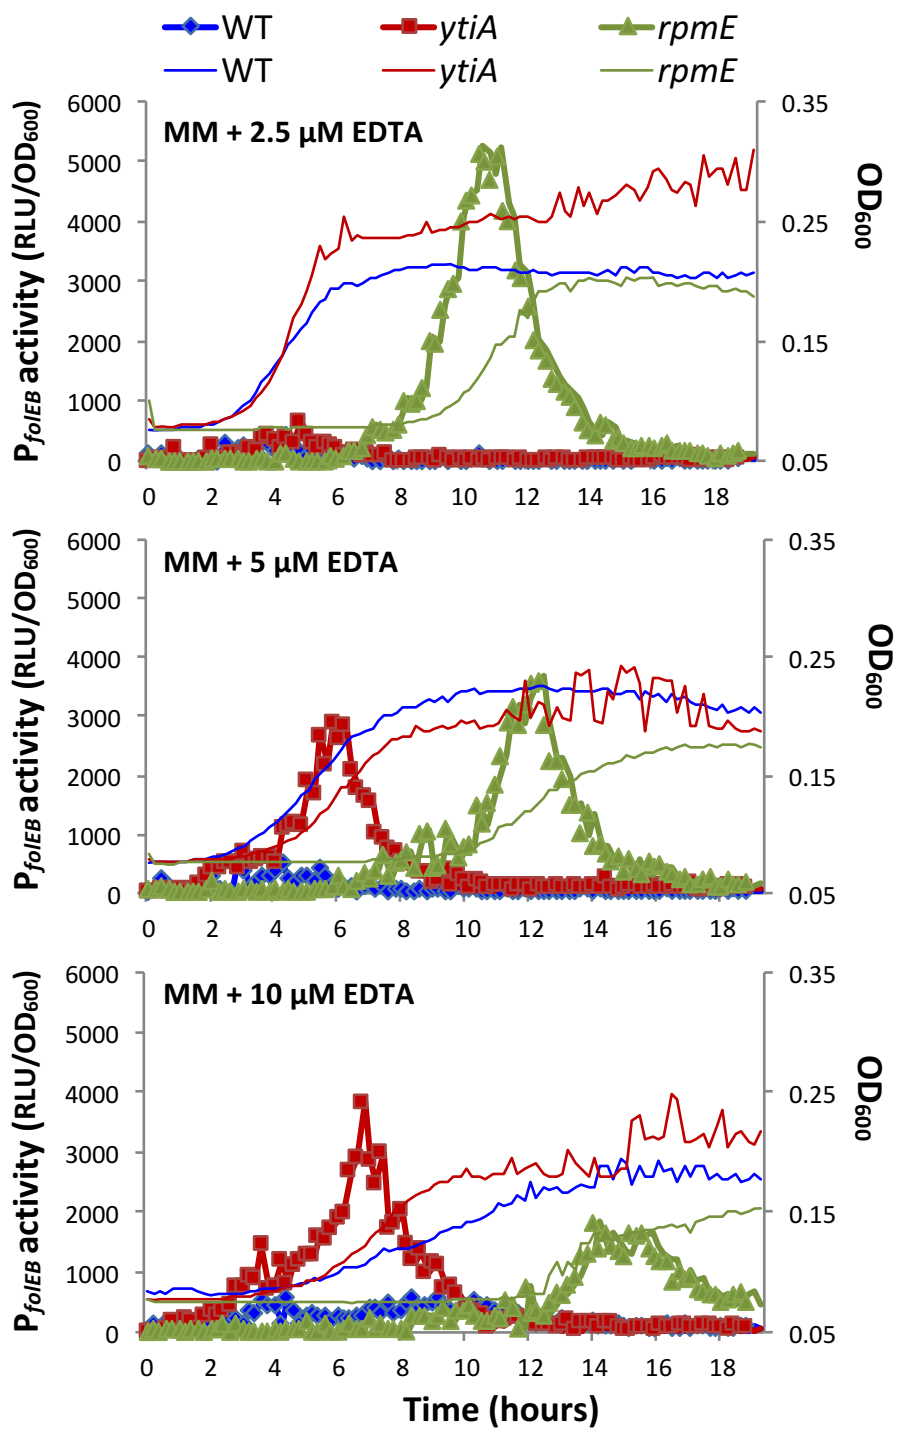

**Figure S4. Zur regulon induction in response to zinc starvation is delayed in strains lacking the L31 (*rpmE*) or Zn-independent L31\* (*ytiA=rpmEB*) ribosomal proteins.** Growth curves of WT (blue), *rpmEB* (red) and *rpmE* (green) mutants in the presence of varying concentrations of EDTA. The induction of the *foIEB* promoter-*lux* fusion in WT (blue diamonds), *rpmEB* (red squares), and *rpmE* mutants (green triangles) in the presence of varying concentrations of EDTA as a function of time is also shown.
